# Supplementary material for: Evidence for sample selection effect and Hawthorne effect in behavioural HIV prevention trial among young women in a rural South African community
Source: PubMed Central journal article supplement (PMC5781067; doi:10.1136/bmjopen-2017-019167), 2018-01-10
Supplement: bmjopen-2017-019167.draft_revisions.pdf [file bmjopen-2017-019167.draft_revisions.pdf]

# BMJ Open

BMJ Open is committed to open peer review. As part of this commitment we make the peer review history of every article we publish publicly available.

When an article is published we post the peer reviewers' comments and the authors' responses online. We also post the versions of the paper that were used during peer review. These are the versions that the peer review comments apply to.

The versions of the paper that follow are the versions that were submitted during the peer review process. They are not the versions of record or the final published versions. They should not be cited or distributed as the published version of this manuscript.

BMJ Open is an open access journal and the full, final, typeset and author-corrected version of record of the manuscript is available on our site with no access controls, subscription charges or pay-per-view fees (<http://bmjopen.bmj.com>).

If you have any questions on BMJ Open's open peer review process please email [editorial.bmjopen@bmj.com](mailto:editorial.bmjopen@bmj.com)

# BMJ Open

## Evidence for sample selection effect and Hawthorne effect in behavioral HIV prevention trial among young women in a rural South African community

|                                 |                                                                                                                                                                                                                                                                                                                                                                                                                                                                                                                                                                                                                                                                                                                                                                                                                                                                                                                                                                                                                                                                                                                                                                                                                                                                                                                                                                                                                                                                                                                                                                                |
|---------------------------------|--------------------------------------------------------------------------------------------------------------------------------------------------------------------------------------------------------------------------------------------------------------------------------------------------------------------------------------------------------------------------------------------------------------------------------------------------------------------------------------------------------------------------------------------------------------------------------------------------------------------------------------------------------------------------------------------------------------------------------------------------------------------------------------------------------------------------------------------------------------------------------------------------------------------------------------------------------------------------------------------------------------------------------------------------------------------------------------------------------------------------------------------------------------------------------------------------------------------------------------------------------------------------------------------------------------------------------------------------------------------------------------------------------------------------------------------------------------------------------------------------------------------------------------------------------------------------------|
| Journal:                        | <i>BMJ Open</i>                                                                                                                                                                                                                                                                                                                                                                                                                                                                                                                                                                                                                                                                                                                                                                                                                                                                                                                                                                                                                                                                                                                                                                                                                                                                                                                                                                                                                                                                                                                                                                |
| Manuscript ID                   | bmjopen-2017-019167                                                                                                                                                                                                                                                                                                                                                                                                                                                                                                                                                                                                                                                                                                                                                                                                                                                                                                                                                                                                                                                                                                                                                                                                                                                                                                                                                                                                                                                                                                                                                            |
| Article Type:                   | Research                                                                                                                                                                                                                                                                                                                                                                                                                                                                                                                                                                                                                                                                                                                                                                                                                                                                                                                                                                                                                                                                                                                                                                                                                                                                                                                                                                                                                                                                                                                                                                       |
| Date Submitted by the Author:   | 15-Aug-2017                                                                                                                                                                                                                                                                                                                                                                                                                                                                                                                                                                                                                                                                                                                                                                                                                                                                                                                                                                                                                                                                                                                                                                                                                                                                                                                                                                                                                                                                                                                                                                    |
| Complete List of Authors:       | Rosenberg, Molly; Indiana University School of Public Health-Bloomington, Epidemiology and Biostatistics<br>Pettifor, Audrey; University of North Carolina at Chapel Hill, Department of Epidemiology, School of Public Health<br>Twine, Rhian; University of the Witwatersrand, MRC/Wits Rural Public Health and Health Transitions Research Unit (Agincourt), School of Public Health, Faculty of Health Sciences<br>Hughes, James; University of Washington School of Public Health, Biostatistics<br>Gómez-Olivé, F. Xavier; University of the Witwatersrand, Medical Research Council/Wits Rural Health and Health Transitions Unit (Agincourt), School of Public Health, Faculty of Health Sciences<br>Wagner, Ryan; University of the Witwatersrand, Johannesburg, MRC/Wits Rural Public Health & Health Transitions Research Unit (Agincourt)<br>Sulaimon, Afolabi; University of the Witwatersrand, 5. MRC/Wits Rural Public Health and Health Transitions Research Unit (Agincourt)<br>Tollman, Stephen; University of the Witwatersrand, School of Public Health, Faculty of Health Sciences<br>Selin, Amanda; University of North Carolina Chapel Hill, Carolina Population Center<br>MacPhail, Catherine; University of the Witwatersrand School of Clinical Medicine, Wits Reproductive Health and HIV Institute (WRHI); University of New England, School of Health<br>Kahn, Kathleen; University of the Witwatersrand, Medical Research Council/Wits Rural Health and Health Transitions Unit (Agincourt), School of Public Health, Faculty of Health Sciences |
| <b>Primary Subject Heading</b>: | Epidemiology                                                                                                                                                                                                                                                                                                                                                                                                                                                                                                                                                                                                                                                                                                                                                                                                                                                                                                                                                                                                                                                                                                                                                                                                                                                                                                                                                                                                                                                                                                                                                                   |
| Secondary Subject Heading:      | Global health, HIV/AIDS, Research methods                                                                                                                                                                                                                                                                                                                                                                                                                                                                                                                                                                                                                                                                                                                                                                                                                                                                                                                                                                                                                                                                                                                                                                                                                                                                                                                                                                                                                                                                                                                                      |
| Keywords:                       | Hawthorne effect, selection effect, HIV prevention, adolescents, South Africa                                                                                                                                                                                                                                                                                                                                                                                                                                                                                                                                                                                                                                                                                                                                                                                                                                                                                                                                                                                                                                                                                                                                                                                                                                                                                                                                                                                                                                                                                                  |

1  
2  
3  
4  
5  
6  
7  
8  
9  
10  
11  
12  
13  
14  
15  
16  
17  
18  
19  
20  
21  
22  
23  
24  
25  
26  
27  
28  
29  
30  
31  
32  
33  
34  
35  
36  
37  
38  
39  
40  
41  
42  
43  
44  
45  
46  
47  
48  
49  
50  
51  
52  
53  
54  
55  
56  
57  
58  
59  
60

For peer review only

**Title:** Evidence for sample selection effect and Hawthorne effect in behavioral HIV prevention trial among young women in a rural South African community

**Authors:** Molly Rosenberg<sup>1,2</sup>, Audrey Pettifor<sup>3,4,5</sup>, Rhian Twine<sup>5</sup>, James P. Hughes<sup>6</sup>, F. Xavier Gomez-Olive<sup>2,5,7</sup>, Ryan G. Wagner<sup>5,10</sup>, Afolabi Sulaimon<sup>5</sup>, Stephen Tollman<sup>5,7,10</sup>, Amanda Selin<sup>4</sup>, Catherine Macphail<sup>5,8,9</sup>, Kathleen Kahn<sup>5,7,10</sup>

**Author affiliations:**

1. Department of Epidemiology and Biostatistics, Indiana University School of Public Health-Bloomington
2. Center for Population and Development Studies, Harvard University
3. Department of Epidemiology, University of North Carolina-Chapel Hill
4. Carolina Population Center, University of North Carolina-Chapel Hill
5. MRC/Wits Rural Public Health and Health Transitions Research Unit (Agincourt), School of Public Health, Faculty of Health Sciences, University of the Witwatersrand, Johannesburg, South Africa
6. Department of Biostatistics, University of Washington
7. INDEPTH Network, Accra, Ghana
8. School of Health and Society, University of Wollongong, New South Wales, Australia
9. Wits Reproductive Health and HIV Institute, University of the Witwatersrand, Johannesburg, South Africa
10. Umeå Centre for Global Health Research, Division of Epidemiology and Global Health, Department of Public Health and Clinical Medicine, Umeå University, Umeå, Sweden

**Corresponding author:**

Molly Rosenberg  
1025 E. 7<sup>th</sup> Street, Office C032  
Bloomington, IN 47405  
Email: rosenmol@indiana.edu  
Phone: +1 (812) 856-2509  
Fax: +1 (812) 855-9107

**Word count:** 2999/3000

**Author contributions:** MR, AP, RT, and KK conceived the study. MR conducted the analysis and wrote the first draft of the manuscript. AP, RT, JPH, FXGO, RGW, AS, ST, AS, CM, and KK were involved in the design of the parent studies and/or in collection, storage, and analysis of data from the parent study. All authors contributed to the interpretation of the findings, critical review of the manuscript, and approval of the final manuscript as submitted.

**Data sharing statement:** Agincourt HDSS data access can be requested at the following link: <http://www.agincourt.co.za/index.php/data/>

1  
2  
3 **Abstract** (252/300 words)  
4

5 *Objectives:* We examined the potential influence of both sample selection effects and  
6 Hawthorne effects in the behavioral HIV Prevention Trial Network (HPTN) study 068, designed  
7 to examine whether cash transfers conditional on school attendance reduce HIV acquisition in  
8 young South African women. We explored whether school enrollment among study participants  
9 differed from the underlying population, and whether differences existed at baseline (sample  
10 selection effect) or arose during study participation (Hawthorne effect).  
11  
12  
13  
14  
15  
16  
17  
18  
19

20 *Methods:* We constructed a cohort of 3889 young women aged 11-20 years using data from the  
21 Agincourt Health and socio-Demographic Surveillance System. We compared school enrollment  
22 in 2011 (trial start) and 2015 (trial end) between those who did (n=1720) and did not (n=2169)  
23 enroll in the trial. To isolate the Hawthorne effect, we restricted the cohort to those enrolled in  
24 school in 2011.  
25  
26  
27  
28  
29  
30  
31  
32

33 *Results:* In 2011, trial participants were already more likely to be enrolled in school compared to  
34 non-participants [RD (95% CI): 6.3 (5.1, 7.5)]. Restricted to those enrolled in school in 2011, trial  
35 participants were also more likely to be enrolled in school in 2015 [RD (95% CI): 7.3 (4.5, 10.2)].  
36  
37  
38  
39  
40 The strength of association increased with age.  
41  
42  
43

44 *Conclusions:* Trial participants across both study arms were more likely to be enrolled in school  
45 than non-participants. Our findings suggest that both sample selection and Hawthorne effects  
46 may have diminished the differences in school enrollment between study arms, a plausible  
47 explanation for the null trial findings. The Hawthorne-specific findings generate hypotheses for  
48 how to structure school retention interventions to prevent HIV.  
49  
50  
51  
52  
53  
54  
55  
56

57 **Key words:** Hawthorne effect, selection effect, HIV prevention, adolescents, South Africa  
58  
59  
60

**Strengths and limitations of this study:**

- To our knowledge, this study is the first to empirically examine whether Hawthorne effects may have influenced study results in an HIV prevention trial.
- We analyzed longitudinal data on a key study outcome (school enrollment) for the underlying population from which study participants were drawn. Complete data are not typically available for source populations in research studies.
- Our Hawthorne-specific findings suggest that aspects of the HPTN 068 protocol could potentially be adapted for school retention interventions to prevent HIV.
- It is important to note that data on HIV incidence, the primary endpoint of HPTN 068, were not available for the underlying target population.
- The differences we attribute to the Hawthorne effect were estimated in an observational dataset with adjustment for key sociodemographic characteristics. The potential for uncontrolled confounding requires that our results be interpreted cautiously.

## INTRODUCTION

The evidence base for public health interventions largely comes from rigorous epidemiologic studies. However, results from epidemiologic studies may not be externally valid when study participant characteristics differ from those in the target population, even with randomization of exposure (referred to here as 'sample selection effect').<sup>1</sup> Further threats to validity can occur if study participation itself induces behavior change (Hawthorne effect, research participation effect, or trial effect, referred to here, collectively, as 'Hawthorne effect').<sup>2,3</sup> Analyzing study data to examine how results may have differed in the target population to which we would like to make inference is critical to making valid conclusions and policy recommendations.

Although epidemiologic training and research have long included at least cursory examinations of external validity,<sup>4</sup> with more recent methodological advancements around transportability of effect estimates from study populations to target populations,<sup>5-7</sup> empirical evaluation of Hawthorne effects is rare. The limited evidence for Hawthorne effects comes largely from clinical randomized controlled trials, most often assessed in cancer and nutrition studies,<sup>8,9</sup> with supporting evidence from HIV treatment research.<sup>10</sup> Trials designed to affect behavior change may be particularly susceptible to Hawthorne effects as the behaviors in question may be influenced by trial participation.<sup>11,12</sup> This is particularly true in HIV prevention research, where Hawthorne effects could pose validity threats if unexpectedly low HIV incidence occurs due to trial-induced risk behavior changes.<sup>13</sup> To our knowledge, no prior HIV prevention trial has empirically examined whether Hawthorne effects influenced study results.

In this study, we examine the potential influence of both sample selection effects and Hawthorne effects in the behavioral HIV Prevention Trial Network (HPTN) study 068,<sup>14,15</sup> designed to examine whether cash transfers conditional on school attendance reduce HIV acquisition in young South African women. Contrary to the study hypothesis, no difference in

1  
2  
3 HIV acquisition was observed between study arms, with high levels of school enrollment and  
4  
5 low HIV incidence in both arms. These findings were surprising given the high background rates  
6  
7 of school dropout in the study area<sup>16-18</sup> and the large body of evidence showing the positive  
8  
9 impact of cash transfers on schooling outcomes<sup>19</sup>, and limited the ability to explore schooling as  
10  
11 a mechanism to reduce HIV risk.  
12  
13

14  
15  
16 Here, we contextualize HPTN 068 findings, using data on school enrollment in the underlying  
17  
18 target population routinely collected by the Agincourt Health and socio-Demographic  
19  
20 Surveillance System (HDSS) in which HPTN 068 was nested. We examine whether school  
21  
22 enrollment trajectories of trial participants differed from non-participants, and whether  
23  
24 differences could be attributed to existing differences in school enrollment at baseline (sample  
25  
26 selection effect) or differences that arose during study participation (Hawthorne effect).  
27  
28  
29  
30

## 31 **METHODS**

### 32 **Study setting and population**

33  
34  
35 The Agincourt HDSS is located in the rural Bushbuckridge municipality of Mpumalanga  
36  
37 province, South Africa<sup>20</sup> and has routinely collected annual vital event data on all people living in  
38  
39 the study area since 1992. Other socio-demographic data is collected at regular but less  
40  
41 frequent intervals. The Agincourt HDSS currently surveys the full cohort of over 115,000 people  
42  
43 living across 31 villages, in an area of economic disadvantage with historically low access to  
44  
45 public services. However, government schools in the study site are free and often provide  
46  
47 feeding programs. HIV contributes a large burden to the community with 19% HIV prevalence  
48  
49 overall in those aged 15 years and older.<sup>21</sup>  
50  
51  
52  
53  
54

55 HPTN 068 was a Phase III individually-randomized trial designed to examine whether cash  
56  
57 transfers conditional on school attendance influence the risk of HIV acquisition in young  
58  
59  
60



1  
2  
3 women.<sup>14 15</sup> Key selection criteria for participation in the study were: current enrollment in  
4 grades 8-11; age 13-20 years; not married or pregnant at baseline; and having a caregiver with  
5 the documents necessary to open a bank account. Age-eligible young women were identified  
6 from Agincourt HDSS records to be contacted for further eligibility screening (n=10,134).<sup>14</sup>  
7  
8 Between March 2011 and December 2012 a total of 2533 young women were enrolled.  
9  
10 Participants were seen annually for a maximum of three years from enrollment or until high  
11 school graduation. Thus, participants who enrolled in the trial in 2011 in grade 11 could exit the  
12 study as early as 2012 after graduating high school. Participants who enrolled in the trial in 2012  
13 in grade 8 or 9 could exit the study as late as March 2015 (Figure 1).  
14  
15  
16  
17  
18  
19  
20  
21  
22  
23  
24

25 Community, household, and individual consents have been obtained for all Agincourt HDSS  
26 census research since its inception with informed verbal consent obtained at each census  
27 round. Ethical approval was obtained from the University of the Witwatersrand's Human  
28 Research Ethics Committee (updated # M110138; original # M960720) and the Mpumalanga  
29 Province Health Research Committee. Ethical approvals for HPTN 068 were provided by the  
30 Office of Human Research Ethics at the University of North Carolina-Chapel Hill (#10-1868),  
31 the University of the Witwatersrand's Human Research Ethics Committee (#101012), and the  
32 Mpumalanga Province Health Research Committee. Ethical approval for this analysis was  
33 provided by the Indiana University Office of Research Compliance (#1608116129).  
34  
35  
36  
37  
38  
39  
40  
41  
42  
43  
44  
45  
46

### 47 **Cohort construction**

48 We constructed our analytic cohort to identify all young women living in the study area at the  
49 time of trial start (2011) regardless of trial participation status. Further restrictions were applied  
50 to build a cohort of young women on comparable age/grade trajectories and to match key HPTN  
51 068 selection criteria. First, we restricted the cohort to include young women between the ages  
52  
53  
54  
55  
56  
57  
58  
59  
60

1  
2  
3 of 13 and 20 years in 2011 or 2012. Based on education data collected by the Agincourt HDSS  
4  
5 in 2009 (education data were collected in 2009 but not again until 2012), we also restricted the  
6  
7 cohort to those who were enrolled in grades that projected to grades 8-11 in 2011 or 2012,  
8  
9 assuming a one-grade increase each year.  
10

### 11 12 13 14 **Key measures**

15  
16 Our primary exposure of interest was *HPTN 068 trial participation* (both trial arms combined).  
17  
18 Our primary outcome of interest was *school enrollment*, which we calculated at 2011 and 2015  
19  
20 based on Agincourt HDSS education data collected in 2009, 2012, and 2015. We used the 2011  
21  
22 school enrollment outcome to assess whether enrollment patterns were already different at the  
23  
24 beginning of the trial, indicating a potential sample selection effect. We used the 2015 school  
25  
26 enrollment outcome to assess whether enrollment patterns were different at the end of the trial,  
27  
28 when both sample selection and Hawthorne effects could be present. We considered young  
29  
30 women as enrolled in school if they indicated current school enrollment or if they reported a  
31  
32 Grade 12 attainment, the final year of secondary schooling. The 2015 time-point aligned with a  
33  
34 census education module, so enrollment status decisions were made based on data reported at  
35  
36 that time. The 2011 time-point did not align with a census education module, so we inferred  
37  
38 enrollment status at this time-point based on changes in status between 2009 and 2012. For  
39  
40 example, if young women reported enrollment in both 2009 and 2012, we inferred they were  
41  
42 also enrolled in 2011. If young women reported enrollment in 2009 but not 2012, we used  
43  
44 changes in educational attainment to infer whether school dropout had occurred before or after  
45  
46 2011.  
47  
48  
49

50  
51  
52 We also explored the potential for confounding and effect measure modification by key  
53  
54 covariates. We examined age on January 1, 2011, categorized as ages of compulsory school  
55  
56 enrollment (ages 11-15 years), older than age for compulsory school enrollment but correct age  
57  
58  
59  
60

1  
2  
3 for grade (ages 16-17 years), and older than age for compulsory school enrollment while also  
4  
5 older than expected for grade (ages 18-20 years). We also examined indicators of household  
6  
7 socio-economic status (SES), measured with a composite index of household assets;  
8  
9 household size; gender of household head; secondary school educational attainment of the  
10  
11 household head; country of origin (South African or Mozambican descent); and pre-2011  
12  
13 childbearing.  
14  
15

### 18 **Analysis**

20 We used binomial regression models with an identity link to estimate the association between  
21  
22 trial participation and school enrollment at 2011 and 2015. The 2011 enrollment outcome was  
23  
24 used to isolate the potential for a sample selection effect (i.e. Were trial participants more likely  
25  
26 to be in school than non-participants at the beginning of the trial?). We used the 2015  
27  
28 enrollment outcome in a restricted cohort of young women who were enrolled in school in 2011  
29  
30 to isolate the potential for a Hawthorne effect at the end of the trial (i.e. Were trial participants  
31  
32 more likely to remain in school after four years than non-participants, conditional on being in  
33  
34 school at the beginning of the trial?).  
35  
36  
37  
38  
39

40 We conducted unadjusted analyses and analyses adjusted for age, SES, gender and education  
41  
42 of household head, household size, country of origin, and pre-2011 child-bearing. School  
43  
44 enrollment decisions were likely highly influenced by age both because our cohort straddled the  
45  
46 age limit for compulsory schooling in South Africa and because school dropout generally  
47  
48 increases with age. Thus, we conducted age-stratified analyses to see whether the associations  
49  
50 between trial participation and school enrollment differed by age category.  
51  
52  
53  
54

### 55 **RESULTS**

56  
57  
58  
59  
60

1  
2  
3 Overall 3889 young women from the Agincourt HDSS were included in our cohort (Table 1).  
4  
5 Median age was 15 years (IQR: 14-16). Young women tended to live in large households (mean  
6  
7 size: 8.4), and household heads were often female (42%) and often lacked high school  
8  
9 education (86%). The majority of young women were of South African descent (60%) and very  
10  
11 few (7%) had begun child-bearing prior to 2011. Just under half of the young women (44%)  
12  
13 went on to participate in HPTN 068, and they tended to be less likely to be on the youngest  
14  
15 (ages 11-12) or oldest (ages 19-20) end of the age spectrum, though median age in both  
16  
17 participants and non-participants was 15. Trial participants were also less likely to have begun  
18  
19 child-bearing, slightly more likely to live in households headed by high school graduates, and  
20  
21 slightly more likely to live in household with above-median SES.  
22  
23  
24  
25  
26

27 In 2011, at the time of HPTN 068 trial start, nearly everyone in the cohort was enrolled in school  
28  
29 (96%), likely due to the age and 2009 enrollment requirements placed on the cohort (Table 2).  
30  
31 However, young women who became trial participants were already more likely to be enrolled in  
32  
33 school (99%) compared to non-participants (93%) [RD (95% CI): 6.3 (5.1, 7.5)], indicating a  
34  
35 sample selection effect likely occurred as a consequence of the school enrollment eligibility  
36  
37 criterion. Though the overall association attenuated after covariate adjustment [aRD (95% CI):  
38  
39 2.9 (-0.7, 6.5)], strong associations were observed in the 18-20 year old age group [aRD (95%  
40  
41 CI): 19.5 (5.6, 33.3)], compared to the younger two age groups [aRD<sub>11-15</sub> (95% CI): 0.4 (-5.2,  
42  
43 5.9); aRD<sub>16-17</sub> (95% CI): 6.3 (0.5, 12.2)].  
44  
45  
46  
47  
48

49 At the end of the trial in 2015, the difference in school enrollment between trial participants  
50  
51 (81%) and non-participants (69%) grew, with an adjusted overall risk difference of 6.8 (95% CI:  
52  
53 3.4, 10.2). To investigate whether any differences in school enrollment could be attributed to a  
54  
55 Hawthorne effect, we restricted the cohort to those enrolled in school in 2011 and examined  
56  
57 differences in 2015. Under this restriction, young women enrolled in the trial were still more  
58  
59  
60

1  
2  
3 likely to remain in school in 2015 (82%), compared to those who did not (74%) with an adjusted  
4 risk difference of 4.9 (95% CI: 1.5, 8.3)]. Again, the association was weakest among 11-15 year  
5 olds [aRD (95% CI): 1.8 (-1.3, 5.0)], and strongest among 18-20 year olds [aRD (95% CI): 22.8  
6 (7.3, 38.2)].  
7  
8  
9  
10

## 11 12 13 14 **DISCUSSION**

15  
16 HPTN 068 found that cash transfers conditional on school enrollment did not influence HIV  
17 acquisition among young women in a rural South African setting. Due to unexpectedly high  
18 levels of school enrollment in both arms, the ability to explore schooling as a mechanism  
19 through which cash transfers could influence HIV acquisition was limited. Here, we found  
20 evidence to suggest that both Hawthorne effects and sample selection effects could threaten  
21 the external validity of these findings. Overall, trial participants were more likely to remain in  
22 school until graduation than non-participants. Differences in school enrollment status were  
23 already apparent at the beginning of the study, suggesting that the trial selection criteria likely  
24 pulled in young women with better school enrollment behaviors than those who were not  
25 enrolled as trial participants (sample selection effect). Differences in school enrollment grew  
26 larger as the trial progressed, and, importantly, remained strong even after restricting to those  
27 enrolled in school in 2011 when the trial started, suggesting the changes in enrollment status  
28 occurred during the trial itself (Hawthorne effect). Both sample selection and Hawthorne effects  
29 may have diminished the differences in school enrollment between study arms and is one  
30 plausible explanation for the overall null study effect.  
31  
32  
33  
34  
35  
36  
37  
38  
39  
40  
41  
42  
43  
44  
45  
46  
47  
48  
49  
50

51 Our findings that trial participation influenced school enrollment behavior could plausibly be  
52 explained by several characteristics of the HPTN 068 study design and protocol. First, all  
53 participants were aware of the objective of the study: to retain young women in school to  
54 prevent HIV. This information could result in school enrollment behavior change to align with  
55  
56  
57  
58  
59  
60

1  
2  
3 perceived expectations of study staff or because young women were motivated to prevent HIV.  
4  
5 Second, compared to non-participants, trial participants were exposed to different networks  
6  
7 likely to be supportive of school enrollment. Adult fieldworkers showed interest in the schooling  
8  
9 of participants with yearly in-person data collection and monthly in-school data collection. Data  
10  
11 were collected in 'camps' wherein trial participants were transported to study offices annually for  
12  
13 a half-day of surveys and blood tests, and entertaining activities during wait periods (e.g.  
14  
15 fingernail painting, photograph taking, magazine reading). This protocol could have fostered a  
16  
17 cohesive group environment among trial participants resulting in positive peer pressure to  
18  
19 maintain school enrollment. There is a growing body of evidence that interventions providing a  
20  
21 safe space with adult mentorship and peer support can have positive outcomes for young  
22  
23 women in sub-Saharan Africa,<sup>22-24</sup> a pathway that may have been activated with trial  
24  
25 participation. Finally, trial participation provided access to certain health and social services that  
26  
27 may have otherwise been inaccessible, including annual HIV and HSV-2 testing and counseling,  
28  
29 linkage to care for those who tested positive, and linkage to social work services for young  
30  
31 women who reported experiences of sexual abuse. These services may have enabled young  
32  
33 women who would have otherwise struggled with serious physical and mental health outcomes  
34  
35 to remain in school.  
36  
37  
38  
39  
40  
41

42 Associations between trial participation and school enrollment were strongest in older age  
43  
44 groups. The small differences observed in the youngest age group are understandable as they  
45  
46 were under the age-limit of compulsory education with requirements to remain in school  
47  
48 regardless of trial influence. For the oldest age group, trial selection criteria for lower grade  
49  
50 levels meant they were older than expected for their grade, and suggested a history of grade  
51  
52 repetition or temporary drop-out. That the trial protocol may have contributed to keeping older  
53  
54 teens in school is significant as the transition to adulthood carries extremely high HIV risk.<sup>21</sup>  
55  
56  
57  
58  
59  
60

1  
2  
3 This study was fairly unusual in that data were available on key study outcomes for the  
4 underlying population from which study participants were drawn. The Agincourt HDSS routinely  
5 collects school enrollment data on all residents in the study area and we were able to leverage  
6 those data to assess differences between trial participants and non-participants. The majority of  
7 epidemiologic studies do not have the benefit of complete background data on the target  
8 population, and, as such, sample selection and Hawthorne effects are rarely empirically  
9 assessed.<sup>3 8 10 12</sup> However, when Hawthorne effects are assessed, the direction of the  
10 relationship between research participation and healthy outcomes tends to be positive, in line  
11 with our findings of improved school enrollment outcomes.  
12  
13  
14  
15  
16  
17  
18  
19  
20  
21  
22  
23  
24

25 It is important to note that data on HIV incidence, the primary endpoint of HPTN 068, were not  
26 available for the underlying target population. We speculate that the improved schooling  
27 trajectories we observed in trial participants likely resulted in reduced risk of HIV acquisition.<sup>15</sup>  
28 Continued schooling is strongly associated with HIV prevention and reduced sexual risk  
29 outcomes in young women in sub-Saharan Africa<sup>16 25 26</sup> and we observed lower HIV incidence  
30 (1.8%) than expected among trial participants (3%). However, we cannot say with certainty that  
31 the association between trial participation and school enrollment extended to HIV protection.  
32  
33  
34  
35  
36  
37  
38  
39  
40  
41  
42

43 The potential for uncontrolled confounding requires that our results be interpreted cautiously.  
44 The differences we attribute to the Hawthorne effect were estimated in an observational dataset.  
45 Initial screens for trial eligibility were performed based on age data maintained by the Agincourt  
46 HDSS and 82% of the eligible young women approached went on to enroll in the study, a fairly  
47 high response rate.<sup>15</sup> Still, it is plausible that those who refused participation were different from  
48 those who consented in ways that are also related to future school enrollment trajectories.  
49 Although we controlled for key socio-demographic characteristics that we theorized could be  
50  
51  
52  
53  
54  
55  
56  
57  
58  
59  
60

1  
2  
3 related to both trial participation and school enrollment, the possibility for bias from unmeasured  
4  
5 confounding remains.  
6  
7  
8

9  
10 We offer three key conclusions from this study. First, epidemiologists should give greater weight  
11  
12 at the planning, analysis, and dissemination stages to identifying how sample selection and  
13  
14 Hawthorne effects can be minimized, assessed, and discussed. Prioritizing research with well-  
15  
16 defined target populations in areas with ongoing background data collection (e.g. HDSS  
17  
18 centers) would improve researchers' abilities to empirically assess the external validity of their  
19  
20 findings. Second, the sample selection effect we observed highlights how school-based  
21  
22 samples can differ in important ways from non-school based samples in terms of underlying  
23  
24 risk. Interventions focused on school-going adolescents may not reach those most in need of  
25  
26 prevention, an anticipated issue that was ultimately difficult to avoid given HPTN 068 design.  
27  
28 Third, the Hawthorne-specific findings suggest that aspects of the HPTN 068 protocol could  
29  
30 potentially be adapted for school retention interventions to prevent HIV. If the relationship we  
31  
32 observed is causal, the trial protocol increased school enrollment at a magnitude similar to  
33  
34 targeted cash transfer interventions and other fairly resource-intensive school retention  
35  
36 interventions in sub-Saharan Africa,<sup>19 27-29</sup> despite the actual contact with the young women  
37  
38 being limited to annual visits. Future work should examine key elements of the study protocol –  
39  
40 adult mentorship, peer support, school attendance monitoring, messaging around the link  
41  
42 between school and HIV, routine HIV/STI testing and linkage to care – to better understand their  
43  
44 relationship with school retention and HIV acquisition.  
45  
46  
47  
48  
49  
50  
51  
52  
53  
54  
55  
56  
57  
58  
59  
60



1  
2  
3 **Acknowledgments:** The Agincourt Health and socio-Demographic Surveillance System is supported  
4 by the Wellcome Trust (058893/Z/99/A; 069683/Z/02/Z; 085477/Z/08/Z; 085477/B/08/Z), the University  
5 of the Witwatersrand, and Medical Research Council, South Africa. HPTN 068 was supported by Award  
6 Numbers UM1 AI068619 (HPTN Leadership and Operations Center), UM1AI068617 (HPTN Statistical  
7 and Data Management Center), and UM1AI068613 (HPTN Laboratory Center) from the National  
8 Institute of Allergy and Infectious Diseases, the National Institute of Mental Health and the National  
9 Institute on Drug Abuse of the National Institutes of Health. This work was also supported by NIMH  
10 (R01MH087118) and the Carolina Population Center and its NIH Center grant (P2C HD050924). The  
11 content is solely the responsibility of the authors and does not necessarily represent the official views of  
12 the National Institutes of Health.  
13  
14  
15  
16  
17  
18  
19  
20  
21  
22  
23  
24  
25  
26  
27  
28  
29  
30  
31  
32  
33  
34  
35  
36  
37  
38  
39  
40  
41  
42  
43  
44  
45  
46  
47  
48  
49  
50  
51  
52  
53  
54  
55  
56  
57  
58  
59  
60

**Figure 1.** Timeline of Agincourt HDSS education data collection and HPTN 068 trial duration

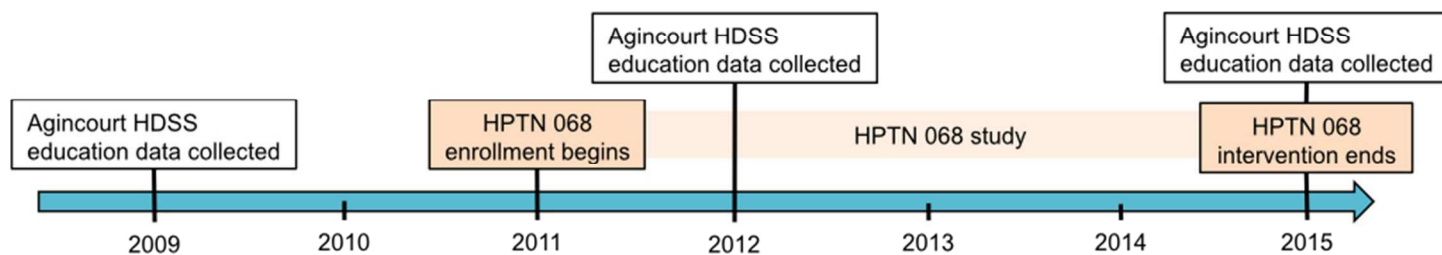

For peer review only

**Table 1.** Socio-demographic characteristics of a cohort of 3889 young women between the ages of 13-20 years in rural Agincourt, South Africa, by participation in the HPTN 068 trial

|                                               | Total<br>(n=3889) |      | Trial participant <sup>2</sup><br>(n=1720) |      | Non-participant<br>(n=2169) |      | p-value <sup>1</sup> |
|-----------------------------------------------|-------------------|------|--------------------------------------------|------|-----------------------------|------|----------------------|
|                                               | N                 | %    | N                                          | %    | N                           | %    |                      |
| <b>Age in 2011</b>                            |                   |      |                                            |      |                             |      | <0.0001              |
| 11 - 12                                       | 188               | 4.8  | 26                                         | 1.5  | 162                         | 7.5  |                      |
| 13 - 14                                       | 1270              | 32.7 | 637                                        | 37.0 | 633                         | 29.2 |                      |
| 15 - 16                                       | 1591              | 40.9 | 793                                        | 46.1 | 798                         | 36.8 |                      |
| 17 - 18                                       | 667               | 17.2 | 239                                        | 13.9 | 428                         | 19.7 |                      |
| 19 - 20                                       | 173               | 4.5  | 25                                         | 1.5  | 148                         | 6.8  |                      |
| <b>SES*</b>                                   |                   |      |                                            |      |                             |      | 0.003                |
| At or above median                            | 1778              | 50   | 853                                        | 52.7 | 925                         | 47.8 |                      |
| Below median                                  | 1778              | 50   | 766                                        | 47.3 | 1012                        | 52.3 |                      |
| Missing                                       | 333               |      | 101                                        |      | 232                         |      |                      |
| <b>Household size*</b>                        |                   |      |                                            |      |                             |      | 0.5                  |
| Mean                                          | 8.4               |      | 8.4                                        |      | 8.5                         |      |                      |
| SD                                            | 4.2               |      | 4.0                                        |      | 4.4                         |      |                      |
| Missing                                       | 46                |      | 14                                         |      | 32                          |      |                      |
| <b>Gender of HH head*</b>                     |                   |      |                                            |      |                             |      | 0.3                  |
| Female                                        | 1590              | 41.7 | 691                                        | 40.8 | 899                         | 42.4 |                      |
| Male                                          | 2224              | 58.3 | 1004                                       | 59.2 | 1220                        | 57.6 |                      |
| Missing                                       | 75                |      | 25                                         |      | 50                          |      |                      |
| <b>Household head educational attainment*</b> |                   |      |                                            |      |                             |      | 0.02                 |
| <Grade 12                                     | 3062              | 86.3 | 1398                                       | 87.8 | 1664                        | 85.1 |                      |
| Grad 12 or higher                             | 486               | 13.7 | 194                                        | 12.2 | 292                         | 14.9 |                      |
| Missing                                       | 341               |      | 128                                        |      | 213                         |      |                      |
| <b>Country of origin*</b>                     |                   |      |                                            |      |                             |      | 0.2                  |
| South Africa                                  | 2315              | 59.6 | 1046                                       | 60.9 | 1269                        | 58.6 |                      |
| Mozambique                                    | 1570              | 40.4 | 673                                        | 39.2 | 897                         | 41.4 |                      |
| Missing                                       | 4                 |      | 1                                          |      | 3                           |      |                      |
| <b>Childbearing before 2011</b>               |                   |      |                                            |      |                             |      | <0.0001              |
| Yes                                           | 274               | 7.1  | 67                                         | 3.9  | 207                         | 9.5  |                      |
| No                                            | 3615              | 93.0 | 1653                                       | 96.1 | 1962                        | 90.5 |                      |
| <b>2011 school enrollment</b>                 |                   |      |                                            |      |                             |      | <0.0001              |
| Yes                                           | 3508              | 95.7 | 1637                                       | 99.2 | 1871                        | 92.9 |                      |
| No                                            | 158               | 4.3  | 14                                         | 0.9  | 144                         | 7.2  |                      |
| Missing                                       | 223               |      | 69                                         |      | 154                         |      |                      |
| <b>2015 school enrollment</b>                 |                   |      |                                            |      |                             |      | <0.0001              |
| Yes                                           | 2465              | 74.2 | 1234                                       | 19   | 1231                        | 68.5 |                      |
| No                                            | 856               | 25.8 | 290                                        | 81   | 566                         | 31.5 |                      |
| Missing                                       | 568               |      | 196                                        |      | 372                         |      |                      |

<sup>1</sup>p-values for categorical variables are from chi-square tests and for continuous variables are from t-tests

<sup>2</sup>Due to restrictions in the cohort construction to maintain comparable groups with respect to age and education status in 2009, not all of the 2533 HPTN 068 participants are represented.

\*Measured in 2009

**Table 2.** The relationship between HPTN 068 trial participation and school enrollment in 2011 and 2015, stratified by age, in the full cohort and the cohort restricted to those enrolled in school in 2011

|                                            | Enrollment | N    | Percent enrolled  | RD (95% CI)       | aRD <sup>1</sup> (95% CI) |
|--------------------------------------------|------------|------|-------------------|-------------------|---------------------------|
| <b>2011: Full cohort</b>                   |            |      |                   |                   |                           |
| <b>All ages</b>                            |            |      |                   |                   |                           |
| Trial participant                          | 1637       | 1651 | 99.2 (98.7, 99.6) | 6.3 (5.1, 7.5)    | 2.9 (-0.7, 6.5)           |
| Non-trial participant                      | 1871       | 2015 | 92.9 (91.7, 94.0) | 1                 | 1                         |
| <b>Ages 11-15</b>                          |            |      |                   |                   |                           |
| Trial participant                          | 1036       | 1038 | 99.8 (99.5, 1.00) | 0.6 (0.0, 1.2)    | 0.4 (-5.2, 5.9)           |
| Non-trial participant                      | 1115       | 1124 | 99.2 (98.6, 99.7) | 1                 | 1                         |
| <b>Ages 16-17</b>                          |            |      |                   |                   |                           |
| Trial participant                          | 532        | 539  | 98.7 (97.8, 99.7) | 6.9 (4.6, 9.2)    | 6.3 (0.5, 12.2)           |
| Non-trial participant                      | 593        | 646  | 91.8 (89.7, 93.9) | 1                 | 1                         |
| <b>Ages 18-20</b>                          |            |      |                   |                   |                           |
| Trial participant                          | 69         | 74   | 93.2 (87.5, 99.0) | 26.7 (18.5, 34.9) | 19.5 (5.6, 33.3)          |
| Non-trial participant                      | 163        | 245  | 66.5 (60.6, 72.4) | 1                 | 1                         |
| <b>2015: Full cohort</b>                   |            |      |                   |                   |                           |
| <b>All ages</b>                            |            |      |                   |                   |                           |
| Trial participant                          | 1234       | 1524 | 81.0 (79.0, 83.0) | 12.5 (9.6, 15.4)  | 6.8 (3.4, 10.2)           |
| Non-trial participant                      | 1231       | 1797 | 68.5 (66.4, 70.7) | 1                 | 1                         |
| <b>Ages 11-15</b>                          |            |      |                   |                   |                           |
| Trial participant                          | 837        | 952  | 87.9 (85.9, 90.0) | 3.8 (0.1, 6.9)    | 1.9 (-1.3, 5.0)           |
| Non-trial participant                      | 833        | 990  | 84.1 (81.9, 86.5) | 1                 | 1                         |
| <b>Ages 16-17</b>                          |            |      |                   |                   |                           |
| Trial participant                          | 361        | 503  | 71.8 (67.9, 75.8) | 12.5 (6.9, 18.1)  | 12.7 (6.7, 18.7)          |
| Non-trial participant                      | 346        | 584  | 59.3 (55.4, 63.4) | 1                 | 1                         |
| <b>Ages 18-20</b>                          |            |      |                   |                   |                           |
| Trial participant                          | 36         | 69   | 52.2 (41.6, 65.4) | 28.9 (15.8, 41.9) | 29.7 (16.1, 43.3)         |
| Non-trial participant                      | 52         | 223  | 23.3 (18.4, 29.6) | 1                 | 1                         |
| <b>2015: Restricted cohort<sup>2</sup></b> |            |      |                   |                   |                           |
| <b>All ages</b>                            |            |      |                   |                   |                           |
| Trial participant                          | 1234       | 1510 | 81.7 (79.8, 83.7) | 7.3 (4.5, 10.2)   | 4.9 (1.5, 8.3)            |
| Non-trial participant                      | 1231       | 1655 | 74.4 (72.3, 76.5) | 1                 | 1                         |
| <b>Ages 11-15</b>                          |            |      |                   |                   |                           |
| Trial participant                          | 837        | 950  | 88.1 (86.1, 90.2) | 3.2 (0.2, 6.3)    | 1.8 (-1.3, 5.0)           |
| Non-trial participant                      | 833        | 982  | 84.8 (82.6, 87.1) | 1                 | 1                         |
| <b>Ages 16-17</b>                          |            |      |                   |                   |                           |
| Trial participant                          | 361        | 496  | 72.8 (69.0, 76.8) | 7.6 (1.9, 13.3)   | 7.9 (1.9, 14.0)           |
| Non-trial participant                      | 346        | 531  | 65.2 (61.2, 69.3) | 1                 | 1                         |
| <b>Ages 18-20</b>                          |            |      |                   |                   |                           |
| Trial participant                          | 36         | 64   | 56.3 (45.3, 69.8) | 19.6 (5.1, 34.1)  | 22.8 (7.3, 38.2)          |
| Non-trial participant                      | 52         | 142  | 36.6 (29.5, 45.5) | 1                 | 1                         |

<sup>1</sup>Adjusted for socio-economic status (coded dichotomously at median household asset index score), country of origin (South African versus Mozambican), educational attainment of household head (coded dichotomously at Grade 12 attainment), gender of household head (male versus female), household size (coded linearly), and pre-2011 childbearing (yes versus no). Models that are not age-stratified are also adjusted for age coded in two-year categories.

<sup>2</sup>Restricted to all young women who were enrolled in school in 2011

RD=risk difference; aRD=adjusted risk difference; CI=confidence interval

## References

1. Westreich D, Edwards JK, Rogawski ET, et al. Causal impact: epidemiological approaches for a public health of consequence. *American journal of public health* 2016;106(6):1011.
2. Adair JG. The Hawthorne effect: A reconsideration of the methodological artifact. *Journal of applied psychology* 1984;69(2):334.
3. McCarney R, Warner J, Iliffe S, et al. The Hawthorne Effect: a randomised, controlled trial. *BMC medical research methodology* 2007;7(1):1.
4. Steckler A, McLeroy KR. The importance of external validity: American Public Health Association, 2008.
5. Cole SR, Stuart EA. Generalizing evidence from randomized clinical trials to target populations the actg 320 trial. *American journal of epidemiology* 2010;172(1):107-15.
6. Hernán MA, VanderWeele TJ. Compound treatments and transportability of causal inference. *Epidemiology (Cambridge, Mass)* 2011;22(3):368.
7. Westreich D, Edwards JK. Invited commentary: every good randomization deserves observation. *American journal of epidemiology* 2015;182(10):857-60.
8. Braunholtz DA, Edwards SJ, Lilford RJ. Are randomized clinical trials good for us (in the short term)? Evidence for a “trial effect”. *Journal of clinical epidemiology* 2001;54(3):217-24.
9. Robinson E, Hardman CA, Halford JC, et al. Eating under observation: a systematic review and meta-analysis of the effect that heightened awareness of observation has on laboratory measured energy intake. *The American journal of clinical nutrition* 2015 doi: 10.3945/ajcn.115.111195 [published Online First: 2015/07/17]
10. Menezes P, Miller WC, Wohl DA, et al. Does HAART efficacy translate to effectiveness? Evidence for a trial effect. *PloS one* 2011;6(7):e21824.
11. McCambridge J, Kypri K, Elbourne D. In randomization we trust? There are overlooked problems in experimenting with people in behavioral intervention trials. *J Clin Epidemiol* 2014;67(3):247-53. doi: 10.1016/j.jclinepi.2013.09.004 [published Online First: 2013/12/10]
12. McCambridge J, Witton J, Elbourne DR. Systematic review of the Hawthorne effect: new concepts are needed to study research participation effects. *J Clin Epidemiol* 2014;67(3):267-77. doi: 10.1016/j.jclinepi.2013.08.015 [published Online First: 2013/11/28]
13. Padian NS, McLoy SI, Balkus JE, et al. Weighing the gold in the gold standard: challenges in HIV prevention research. *AIDS (London, England)* 2010;24(5):621.
14. Pettifor A, MacPhail C, Selin A, et al. HPTN 068: a randomized control trial of a conditional cash transfer to reduce HIV infection in young women in South Africa—study design and baseline results. *AIDS and behavior* 2016;20(9):1863-82.
15. Pettifor A, MacPhail C, Hughes JP, et al. The effect of a conditional cash transfer on HIV incidence in young women in rural South Africa (HPTN 068): a phase 3, randomised controlled trial. *The Lancet Global Health* 2016;4(12):e978-e88.
16. Rosenberg M, Pettifor A, Miller WC, et al. Relationship between school dropout and teen pregnancy among rural South African young women. *International journal of epidemiology* 2015:dyv007.
17. Strassburg S, Meny-Gibert S, Russell B. Left unfinished: Temporary absence and drop-out from South African schools. Access to Education. Johannesburg, South Africa: Social Surveys Africa, 2010.

18. Department of Basic Education Republic of South Africa. Education for All 2014 Progress Report: South Africa. Pretoria, 2014.
19. Baird S, Ferreira FH, Özler B, et al. Relative effectiveness of conditional and unconditional cash transfers for schooling outcomes in developing countries: a systematic review. *Campbell systematic reviews* 2013;9(8)
20. Kahn K, Collinson MA, Gomez-Olive FX, et al. Profile: Agincourt Health and Socio-demographic Surveillance System. *International journal of epidemiology* 2012;41(4):988-1001. doi: 10.1093/ije/dys115 [published Online First: 2012/08/31]
21. Gómez-Olivé FX, Angotti N, Houle B, et al. Prevalence of HIV among those 15 and older in rural South Africa. *AIDS care* 2013;25(9):1122-28.
22. Erulkar AS, Muthengi E. Evaluation of Berhane Hewan: a program to delay child marriage in rural Ethiopia. *International Perspectives on Sexual and Reproductive Health* 2009:6-14.
23. Bandiera O, Buehren N, Burgess R, et al. Empowering adolescent girls: Evidence from a randomized control trial in Uganda. *Washington, DC: World Bank* 2012
24. Austrian K, Hewett P, Soler-Hampejsek E, et al. Adolescent Girls Empowerment Programme: Research and Evaluation Mid-Term Technical Report. Lusaka, Zambia: Population Council, 2016.
25. Pettifor AE, Levandowski BA, MacPhail C, et al. Keep them in school: the importance of education as a protective factor against HIV infection among young South African women. *International journal of epidemiology* 2008;37(6):1266-73. doi: 10.1093/ije/dyn131 [published Online First: 2008/07/11]
26. Jukes M, Simmons S, Bundy D. Education and vulnerability: the role of schools in protecting young women and girls from HIV in southern Africa. *AIDS (London, England)* 2008;22 Suppl 4:S41-56. doi: 10.1097/01.aids.0000341776.71253.04 [published Online First: 2008/12/17]
27. Cho H, Hallfors DD, Mbai, II, et al. Keeping adolescent orphans in school to prevent human immunodeficiency virus infection: evidence from a randomized controlled trial in Kenya. *The Journal of adolescent health : official publication of the Society for Adolescent Medicine* 2011;48(5):523-6. doi: 10.1016/j.jadohealth.2010.08.007 [published Online First: 2011/04/20]
28. Hallfors D, Cho H, Rusakaniko S, et al. Supporting adolescent orphan girls to stay in school as HIV risk prevention: evidence from a randomized controlled trial in Zimbabwe. *Am J Public Health* 2011;101(6):1082-8. doi: AJP.2010.300042 [pii]10.2105/AJP.2010.300042 [published Online First: 2011/04/16]
29. Baird S, Chirwa E, McIntosh C, et al. The short-term impacts of a schooling conditional cash transfer program on the sexual behavior of young women. *Health economics* 2010;19 Suppl:55-68. doi: 10.1002/hec.1569 [published Online First: 2009/12/01]

1  
2  
3  
4  
5  
6  
7  
8  
9  
10  
11  
12  
13  
14  
15  
16  
17  
18  
19  
20  
21  
22  
23  
24  
25  
26  
27  
28  
29  
30  
31  
32  
33  
34  
35  
36  
37  
38  
39  
40  
41  
42  
43  
44  
45  
46  
47  
48  
49  
50  
51  
52  
53  
54  
55  
56  
57  
58  
59  
60

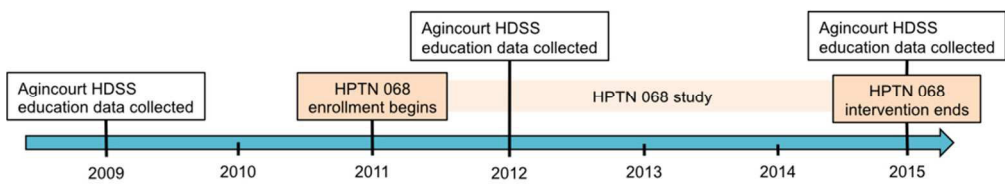

361x270mm (72 x 72 DPI)

ew only

STROBE Statement—Checklist of items that should be included in reports of *cohort studies*

|                           | Item No | Recommendation                                                                                                                                                                                    | Page number |
|---------------------------|---------|---------------------------------------------------------------------------------------------------------------------------------------------------------------------------------------------------|-------------|
| <b>Title and abstract</b> | 1       | (a) Indicate the study's design with a commonly used term in the title or the abstract                                                                                                            | 2           |
|                           |         | (b) Provide in the abstract an informative and balanced summary of what was done and what was found                                                                                               | 2           |
| <b>Introduction</b>       |         |                                                                                                                                                                                                   |             |
| Background/rationale      | 2       | Explain the scientific background and rationale for the investigation being reported                                                                                                              | 4           |
| Objectives                | 3       | State specific objectives, including any prespecified hypotheses                                                                                                                                  | 5           |
| <b>Methods</b>            |         |                                                                                                                                                                                                   |             |
| Study design              | 4       | Present key elements of study design early in the paper                                                                                                                                           | 5-7         |
| Setting                   | 5       | Describe the setting, locations, and relevant dates, including periods of recruitment, exposure, follow-up, and data collection                                                                   | 5-7         |
| Participants              | 6       | (a) Give the eligibility criteria, and the sources and methods of selection of participants. Describe methods of follow-up                                                                        | 5-7         |
|                           |         | (b) For matched studies, give matching criteria and number of exposed and unexposed                                                                                                               |             |
| Variables                 | 7       | Clearly define all outcomes, exposures, predictors, potential confounders, and effect modifiers. Give diagnostic criteria, if applicable                                                          | 7           |
| Data sources/measurement  | 8*      | For each variable of interest, give sources of data and details of methods of assessment (measurement). Describe comparability of assessment methods if there is more than one group              | 7           |
| Bias                      | 9       | Describe any efforts to address potential sources of bias                                                                                                                                         | 8           |
| Study size                | 10      | Explain how the study size was arrived at                                                                                                                                                         | 6-7         |
| Quantitative variables    | 11      | Explain how quantitative variables were handled in the analyses. If applicable, describe which groupings were chosen and why                                                                      | 7-8         |
| Statistical methods       | 12      | (a) Describe all statistical methods, including those used to control for confounding                                                                                                             | 8           |
|                           |         | (b) Describe any methods used to examine subgroups and interactions                                                                                                                               | 8           |
|                           |         | (c) Explain how missing data were addressed                                                                                                                                                       | Table 1     |
|                           |         | (d) If applicable, explain how loss to follow-up was addressed                                                                                                                                    | Table 1     |
|                           |         | (e) Describe any sensitivity analyses                                                                                                                                                             | n/a         |
| <b>Results</b>            |         |                                                                                                                                                                                                   |             |
| Participants              | 13*     | (a) Report numbers of individuals at each stage of study—eg numbers potentially eligible, examined for eligibility, confirmed eligible, included in the study, completing follow-up, and analysed | 9           |
|                           |         | (b) Give reasons for non-participation at each stage                                                                                                                                              | n/a         |
|                           |         | (c) Consider use of a flow diagram                                                                                                                                                                | n/a         |
| Descriptive data          | 14*     | (a) Give characteristics of study participants (eg demographic, clinical, social) and information on exposures and potential confounders                                                          | 9           |
|                           |         | (b) Indicate number of participants with missing data for each variable of interest                                                                                                               | Table 1     |
|                           |         | (c) Summarise follow-up time (eg, average and total amount)                                                                                                                                       | n/a         |
| Outcome data              | 15*     | Report numbers of outcome events or summary measures over time                                                                                                                                    | Table 1     |
| Main results              | 16      | (a) Give unadjusted estimates and, if applicable, confounder-adjusted estimates and their precision (eg, 95% confidence interval). Make clear                                                     | Table 2     |



|                          |    |                                                                                                                                                                            |         |
|--------------------------|----|----------------------------------------------------------------------------------------------------------------------------------------------------------------------------|---------|
|                          |    | which confounders were adjusted for and why they were included                                                                                                             |         |
|                          |    | (b) Report category boundaries when continuous variables were categorized                                                                                                  | Table 2 |
|                          |    | (c) If relevant, consider translating estimates of relative risk into absolute risk for a meaningful time period                                                           | Table 2 |
| Other analyses           | 17 | Report other analyses done—eg analyses of subgroups and interactions, and sensitivity analyses                                                                             | Table 2 |
| <b>Discussion</b>        |    |                                                                                                                                                                            |         |
| Key results              | 18 | Summarise key results with reference to study objectives                                                                                                                   | 10      |
| Limitations              | 19 | Discuss limitations of the study, taking into account sources of potential bias or imprecision. Discuss both direction and magnitude of any potential bias                 | 10-13   |
| Interpretation           | 20 | Give a cautious overall interpretation of results considering objectives, limitations, multiplicity of analyses, results from similar studies, and other relevant evidence | 10-13   |
| Generalisability         | 21 | Discuss the generalisability (external validity) of the study results                                                                                                      | 10-13   |
| <b>Other information</b> |    |                                                                                                                                                                            |         |
| Funding                  | 22 | Give the source of funding and the role of the funders for the present study and, if applicable, for the original study on which the present article is based              | 14      |

\*Give information separately for exposed and unexposed groups.

**Note:** An Explanation and Elaboration article discusses each checklist item and gives methodological background and published examples of transparent reporting. The STROBE checklist is best used in conjunction with this article (freely available on the Web sites of PLoS Medicine at <http://www.plosmedicine.org/>, Annals of Internal Medicine at <http://www.annals.org/>, and Epidemiology at <http://www.epidem.com/>). Information on the STROBE Initiative is available at <http://www.strobe-statement.org>.

# BMJ Open

## Evidence for sample selection effect and Hawthorne effect in behavioral HIV prevention trial among young women in a rural South African community

|                                 |                                                                                                                                                                                                                                                                                                                                                                                                                                                                                                                                                                                                                                                                                                                                                                                                                                                                                                                                                                                                                                                                                                                                                                                                                                                                                                                                                                                                                                                                                                                                                                                |
|---------------------------------|--------------------------------------------------------------------------------------------------------------------------------------------------------------------------------------------------------------------------------------------------------------------------------------------------------------------------------------------------------------------------------------------------------------------------------------------------------------------------------------------------------------------------------------------------------------------------------------------------------------------------------------------------------------------------------------------------------------------------------------------------------------------------------------------------------------------------------------------------------------------------------------------------------------------------------------------------------------------------------------------------------------------------------------------------------------------------------------------------------------------------------------------------------------------------------------------------------------------------------------------------------------------------------------------------------------------------------------------------------------------------------------------------------------------------------------------------------------------------------------------------------------------------------------------------------------------------------|
| Journal:                        | <i>BMJ Open</i>                                                                                                                                                                                                                                                                                                                                                                                                                                                                                                                                                                                                                                                                                                                                                                                                                                                                                                                                                                                                                                                                                                                                                                                                                                                                                                                                                                                                                                                                                                                                                                |
| Manuscript ID                   | bmjopen-2017-019167.R1                                                                                                                                                                                                                                                                                                                                                                                                                                                                                                                                                                                                                                                                                                                                                                                                                                                                                                                                                                                                                                                                                                                                                                                                                                                                                                                                                                                                                                                                                                                                                         |
| Article Type:                   | Research                                                                                                                                                                                                                                                                                                                                                                                                                                                                                                                                                                                                                                                                                                                                                                                                                                                                                                                                                                                                                                                                                                                                                                                                                                                                                                                                                                                                                                                                                                                                                                       |
| Date Submitted by the Author:   | 02-Nov-2017                                                                                                                                                                                                                                                                                                                                                                                                                                                                                                                                                                                                                                                                                                                                                                                                                                                                                                                                                                                                                                                                                                                                                                                                                                                                                                                                                                                                                                                                                                                                                                    |
| Complete List of Authors:       | Rosenberg, Molly; Indiana University School of Public Health-Bloomington, Epidemiology and Biostatistics<br>Pettifor, Audrey; University of North Carolina at Chapel Hill, Department of Epidemiology, School of Public Health<br>Twine, Rhian; University of the Witwatersrand, MRC/Wits Rural Public Health and Health Transitions Research Unit (Agincourt), School of Public Health, Faculty of Health Sciences<br>Hughes, James; University of Washington School of Public Health, Biostatistics<br>Gómez-Olivé, F. Xavier; University of the Witwatersrand, Medical Research Council/Wits Rural Health and Health Transitions Unit (Agincourt), School of Public Health, Faculty of Health Sciences<br>Wagner, Ryan; University of the Witwatersrand, Johannesburg, MRC/Wits Rural Public Health & Health Transitions Research Unit (Agincourt)<br>Sulaimon, Afolabi; University of the Witwatersrand, 5. MRC/Wits Rural Public Health and Health Transitions Research Unit (Agincourt)<br>Tollman, Stephen; University of the Witwatersrand, School of Public Health, Faculty of Health Sciences<br>Selin, Amanda; University of North Carolina Chapel Hill, Carolina Population Center<br>MacPhail, Catherine; University of the Witwatersrand School of Clinical Medicine, Wits Reproductive Health and HIV Institute (WRHI); University of New England, School of Health<br>Kahn, Kathleen; University of the Witwatersrand, Medical Research Council/Wits Rural Health and Health Transitions Unit (Agincourt), School of Public Health, Faculty of Health Sciences |
| <b>Primary Subject Heading</b>: | Epidemiology                                                                                                                                                                                                                                                                                                                                                                                                                                                                                                                                                                                                                                                                                                                                                                                                                                                                                                                                                                                                                                                                                                                                                                                                                                                                                                                                                                                                                                                                                                                                                                   |
| Secondary Subject Heading:      | Global health, HIV/AIDS, Research methods                                                                                                                                                                                                                                                                                                                                                                                                                                                                                                                                                                                                                                                                                                                                                                                                                                                                                                                                                                                                                                                                                                                                                                                                                                                                                                                                                                                                                                                                                                                                      |
| Keywords:                       | Hawthorne effect, selection effect, HIV prevention, adolescents, South Africa                                                                                                                                                                                                                                                                                                                                                                                                                                                                                                                                                                                                                                                                                                                                                                                                                                                                                                                                                                                                                                                                                                                                                                                                                                                                                                                                                                                                                                                                                                  |
|                                 |                                                                                                                                                                                                                                                                                                                                                                                                                                                                                                                                                                                                                                                                                                                                                                                                                                                                                                                                                                                                                                                                                                                                                                                                                                                                                                                                                                                                                                                                                                                                                                                |

1  
2  
3  
4  
5  
6  
7  
8  
9  
10  
11  
12  
13  
14  
15  
16  
17  
18  
19  
20  
21  
22  
23  
24  
25  
26  
27  
28  
29  
30  
31  
32  
33  
34  
35  
36  
37  
38  
39  
40  
41  
42  
43  
44  
45  
46  
47  
48  
49  
50  
51  
52  
53  
54  
55  
56  
57  
58  
59  
60

For peer review only

**Title:** Evidence for sample selection effect and Hawthorne effect in behavioral HIV prevention trial among young women in a rural South African community

**Authors:** Molly Rosenberg<sup>1,2</sup>, Audrey Pettifor<sup>3,4,5</sup>, Rhian Twine<sup>5</sup>, James P. Hughes<sup>6</sup>, F. Xavier Gomez-Olive<sup>2,5,7</sup>, Ryan G. Wagner<sup>5,10</sup>, Afolabi Sulaimon<sup>5</sup>, Stephen Tollman<sup>5,7,10</sup>, Amanda Selin<sup>4</sup>, Catherine Macphail<sup>5,8,9</sup>, Kathleen Kahn<sup>5,7,10</sup>

**Author affiliations:**

1. Department of Epidemiology and Biostatistics, Indiana University School of Public Health-Bloomington
2. Center for Population and Development Studies, Harvard University
3. Department of Epidemiology, University of North Carolina-Chapel Hill
4. Carolina Population Center, University of North Carolina-Chapel Hill
5. MRC/Wits Rural Public Health and Health Transitions Research Unit (Agincourt), School of Public Health, Faculty of Health Sciences, University of the Witwatersrand, Johannesburg, South Africa
6. Department of Biostatistics, University of Washington
7. INDEPTH Network, Accra, Ghana
8. School of Health and Society, University of Wollongong, New South Wales, Australia
9. Wits Reproductive Health and HIV Institute, University of the Witwatersrand, Johannesburg, South Africa
10. Umeå Centre for Global Health Research, Division of Epidemiology and Global Health, Department of Public Health and Clinical Medicine, Umeå University, Umeå, Sweden

**Corresponding author:**

Molly Rosenberg  
1025 E. 7<sup>th</sup> Street, Office C032  
Bloomington, IN 47405  
Email: rosenmol@indiana.edu  
Phone: +1 (812) 856-2509  
Fax: +1 (812) 855-9107

**Word count:** 3445/3000

**Author contributions:** MR, AP, RT, and KK conceived the study. MR conducted the analysis and wrote the first draft of the manuscript. AP, RT, JPH, FXGO, RGW, AS, ST, AS, CM, and KK were involved in the design of the parent studies and/or in collection, storage, and analysis of data from the parent study. All authors contributed to the interpretation of the findings, critical review of the manuscript, and approval of the final manuscript as submitted.

**Data sharing statement:** Agincourt HDSS data access can be requested at the following link: <http://www.agincourt.co.za/index.php/data/>

**Competing interests:** The authors declare no competing interests.

1  
2  
3 **Abstract** (262/300 words)  
4

5 *Objectives:* We examined the potential influence of both sample selection effects and  
6 Hawthorne effects in the behavioral HIV Prevention Trial Network (HPTN) study 068, designed  
7 to examine whether cash transfers conditional on school attendance reduce HIV acquisition in  
8 young South African women. We explored whether school enrollment among study participants  
9 differed from the underlying population, and whether differences existed at baseline (sample  
10 selection effect) or arose during study participation (Hawthorne effect).  
11  
12  
13  
14  
15  
16  
17  
18  
19

20 *Methods:* We constructed a cohort of 3889 young women aged 11-20 years using data from the  
21 Agincourt Health and socio-Demographic Surveillance System. We compared school enrollment  
22 in 2011 (trial start) and 2015 (trial end) between those who did (n=1720) and did not (n=2169)  
23 enroll in the trial. To isolate the Hawthorne effect, we restricted the cohort to those enrolled in  
24 school in 2011.  
25  
26  
27  
28  
29  
30  
31

32 *Results:* In 2011, trial participants were already more likely to be enrolled in school (99%)  
33 compared to non-participants (93%). However, this association was attenuated with covariate  
34 adjustment [aRD (95% CI): 2.9 (-0.7, 6.5)]. Restricting to those enrolled in school in 2011, trial  
35 participants were also more likely to be enrolled in school in 2015 [aRD (95% CI): 4.9 (1.5, 8.3)].  
36  
37  
38  
39  
40  
41 The strength of associations increased with age.  
42  
43  
44

45 *Conclusions:* Trial participants across both study arms were more likely to be enrolled in school  
46 than non-participants. Our findings suggest that both sample selection and Hawthorne effects  
47 may have diminished the differences in school enrollment between study arms, a plausible  
48 explanation for the null trial findings. The Hawthorne-specific findings generate hypotheses for  
49 how to structure school retention interventions to prevent HIV.  
50  
51  
52  
53  
54  
55  
56  
57  
58  
59  
60

1  
2  
3 **Key words:** Hawthorne effect, selection effect, HIV prevention, adolescents, South Africa  
4

5 **Strengths and limitations of this study:**  
6

- 7
- 8 • To our knowledge, this study is the first to empirically examine whether Hawthorne  
9 effects may have influenced study results in an HIV prevention trial.  
10
  - 11 • We analyzed longitudinal data on a key study outcome (school enrollment) for the  
12 underlying population from which study participants were drawn. Complete data are not  
13 typically available for source populations in research studies.  
14
  - 15 • Our Hawthorne-specific findings suggest that aspects of the HPTN 068 protocol could  
16 potentially be adapted for school retention interventions to prevent HIV.  
17
  - 18 • It is important to note that data on HIV incidence, the primary endpoint of HPTN 068,  
19 were not available for the underlying target population.  
20
  - 21 • The differences we attribute to the Hawthorne effect were estimated in an observational  
22 dataset with adjustment for key sociodemographic characteristics. The potential for  
23 uncontrolled confounding requires that our results be interpreted cautiously.  
24  
25  
26  
27  
28  
29  
30  
31  
32  
33  
34  
35  
36  
37  
38  
39  
40  
41  
42  
43  
44  
45  
46  
47  
48  
49  
50  
51  
52  
53  
54  
55  
56  
57  
58  
59  
60

## INTRODUCTION

The evidence base for public health interventions largely comes from rigorous epidemiologic studies.<sup>1 2</sup> However, results from epidemiologic studies may not be generalizable (or ‘externally valid’) when study participant characteristics differ from those in the target population, even with randomization of exposure (referred to here as ‘sample selection effect’).<sup>3</sup> Further threats to validity can occur if study participation itself induces behavior change (Hawthorne effect, research participation effect, or trial effect, referred to here, collectively, as ‘Hawthorne effect’).<sup>4</sup> Analyzing study data to examine how results may have differed in the target population to which we would like to make inference is critical to making valid conclusions and policy recommendations.

Although epidemiologic training and research have long included at least cursory examinations of external validity,<sup>6</sup> with more recent methodological advancements around transportability of effect estimates from study populations to target populations,<sup>7-9</sup> empirical evaluation of Hawthorne effects is rare. The limited evidence for Hawthorne effects comes largely from clinical randomized controlled trials, most often assessed in cancer and nutrition studies,<sup>10 11</sup> with supporting evidence from HIV treatment research.<sup>12</sup> Trials designed to affect behavior change may be particularly susceptible to Hawthorne effects as the behaviors in question may be influenced by trial participation.<sup>13 14</sup> This is particularly true in HIV prevention research, where Hawthorne effects could pose validity threats if unexpectedly low HIV incidence occurs due to trial-induced risk behavior changes.<sup>15</sup> To our knowledge, no prior HIV prevention trial has empirically examined whether Hawthorne effects influenced study results.

In this study, we examine the potential influence of both sample selection effects and Hawthorne effects in the behavioral HIV Prevention Trial Network (HPTN) study 068,<sup>16 17</sup> designed to examine whether cash transfers conditional on school attendance reduce HIV

1  
2  
3 acquisition in young South African women. Contrary to the study hypothesis, no difference in  
4  
5 HIV acquisition was observed between study arms, with high levels of school enrollment and  
6  
7 low HIV incidence in both arms. These findings were surprising given the high background rates  
8  
9 of school dropout in the study area<sup>18-20</sup> and the large body of evidence showing the positive  
10  
11 impact of cash transfers on schooling outcomes<sup>21</sup>, and limited the ability to explore schooling as  
12  
13 a mechanism to reduce HIV risk.  
14  
15

16  
17  
18 Here, we contextualize HPTN 068 findings, using data on school enrollment in the underlying  
19  
20 target population routinely collected by the Agincourt Health and socio-Demographic  
21  
22 Surveillance System (HDSS) in which HPTN 068 was nested. We examine whether school  
23  
24 enrollment trajectories of trial participants differed from non-participants, and whether  
25  
26 differences could be attributed to existing differences in school enrollment at baseline (sample  
27  
28 selection effect) or differences that arose during study participation (Hawthorne effect).  
29  
30

## 31 32 **METHODS**

### 33 34 **Study setting and population**

35  
36 The Agincourt HDSS is located in the rural Bushbuckridge municipality of Mpumalanga  
37  
38 province, South Africa<sup>22</sup> and has routinely collected annual vital event data on all people living in  
39  
40 the study area since 1992. Other socio-demographic data are collected at regular but less  
41  
42 frequent intervals. For example, educational attainment is queried every three years,  
43  
44 employment data are collected every four years, and a household asset index is measured  
45  
46 every other year. The Agincourt HDSS currently surveys the full cohort of over 115,000 people  
47  
48 living across 31 villages, in an area of economic disadvantage with historically low access to  
49  
50 public services. However, government schools in the study site are free and often provide  
51  
52 feeding programs. HIV contributes a large burden to the community with 19% HIV prevalence  
53  
54 overall in those aged 15 years and older.<sup>23</sup>  
55  
56  
57  
58  
59  
60



1  
2  
3  
4  
5 HPTN 068 was a Phase III individually-randomized trial designed to examine whether cash  
6 transfers conditional on school attendance influence the risk of HIV acquisition in young  
7 women.<sup>16 17</sup> Young women and their caregivers were randomly assigned to receive a monthly  
8 cash transfer conditional on  $\geq 80\%$  school attendance or no cash transfer. The size of the  
9 monthly cash transfer was 300 Rands (R; about US\$30 in 2012), and was divided into R200  
10 provided to the caregiver and R100 provided to the young woman. Key selection criteria for  
11 participation in the study were: current enrollment in grades 8-11; age 13-20 years; not married  
12 or pregnant at baseline; and having a caregiver with the documents necessary to open a bank  
13 account. Age-eligible young women were identified from Agincourt HDSS records to be  
14 contacted for further eligibility screening (n=10,134).<sup>16</sup> Between March 2011 and December  
15 2012 a total of 2533 young women were enrolled. Participants were seen annually for a  
16 maximum of three years from enrollment or until high school graduation. Thus, participants who  
17 enrolled in the trial in 2011 in grade 11 could exit the study as early as 2012 after graduating  
18 high school. Participants who enrolled in the trial in 2012 in grade 8 or 9 could exit the study as  
19 late as March 2015 (Figure 1).

20  
21  
22  
23  
24  
25  
26  
27  
28  
29  
30  
31  
32  
33  
34  
35  
36  
37  
38  
39 Community, household, and individual consents have been obtained for all Agincourt HDSS  
40 census research since its inception with informed verbal consent obtained at each census  
41 round. Ethical approval was obtained from the University of the Witwatersrand's Human  
42 Research Ethics Committee (updated # M110138; original # M960720) and the Mpumalanga  
43 Province Health Research Committee. Ethical approvals for HPTN 068 were provided by the  
44 Office of Human Research Ethics at the University of North Carolina-Chapel Hill (#10-1868),  
45 the University of the Witwatersrand's Human Research Ethics Committee (#101012), and the  
46  
47  
48  
49  
50  
51  
52  
53  
54  
55  
56  
57  
58  
59  
60

1  
2  
3 Mpumalanga Province Health Research Committee. Ethical approval for this analysis was  
4 provided by the Indiana University Office of Research Compliance (#1608116129).  
5  
6  
7

### 8 9 **Cohort construction**

10 We constructed our analytic cohort to identify all young women living in the study area at the  
11 time of trial start (2011) regardless of trial participation status. Further restrictions were applied  
12 to build a cohort of young women on comparable age/grade trajectories and to match key HPTN  
13 068 selection criteria. First, we restricted the cohort to include young women between the ages  
14 of 13 and 20 years in 2011 or 2012. Based on education data collected by the Agincourt HDSS  
15 in 2009 (education data were collected in 2009 but not again until 2012), we also restricted the  
16 cohort to those who were enrolled in grades that projected to grades 8-11 in 2011 or 2012,  
17 assuming a one-grade increase each year.  
18  
19  
20  
21  
22  
23  
24  
25  
26  
27  
28  
29

### 30 **Key measures**

31 Our primary exposure of interest was *HPTN 068 trial participation* (both trial arms combined).  
32 We analyzed both arms together because trial results indicated essentially no differences in  
33 school attendance and enrollment data between the arms. School attendance was high ( $\geq 80\%$ )  
34 for 95% of the intervention arm and 96% of the control arm participants. Permanent school  
35 dropout occurred at a rate of 3 per 100 person years in both arms.<sup>17</sup>  
36  
37  
38  
39  
40  
41  
42  
43  
44

45 Our primary outcome of interest was *school enrollment*, which we calculated at 2011 and 2015  
46 based on Agincourt HDSS education data collected in 2009, 2012, and 2015. We used the 2011  
47 school enrollment outcome to assess whether enrollment patterns were already different at the  
48 beginning of the trial, indicating a potential sample selection effect. We used the 2015 school  
49 enrollment outcome to assess whether enrollment patterns were different at the end of the trial,  
50 when both sample selection and Hawthorne effects could be present. We considered young  
51  
52  
53  
54  
55  
56  
57  
58  
59  
60

1  
2  
3 women as enrolled in school if they indicated current school enrollment or if they reported a  
4  
5 Grade 12 attainment, the final year of secondary schooling.  
6  
7

8  
9 With the 2009, 2012, and 2015 education modules, fieldworkers updated the highest education  
10  
11 level each young woman achieved and recorded whether or not she was currently enrolled in  
12  
13 school. The 2015 time-point aligned with a census education module, so enrollment status  
14  
15 decisions were made based on data reported at that time. The 2011 time-point did not align with  
16  
17 a census education module, so we inferred enrollment status at this time-point based on  
18  
19 changes in status between 2009 and 2012. If young women reported enrollment in both 2009  
20  
21 and 2012, we inferred they were also enrolled in 2011. If young women reported enrollment in  
22  
23 2009 but not 2012, we used changes in educational attainment to infer whether school dropout  
24  
25 had occurred before or after 2011. For example, if a young woman reported grade 7 attainment  
26  
27 in 2009 and grade 10 attainment in 2012, we assumed that the three years of additional  
28  
29 education were accumulated in 2009, 2010, and 2011. This young woman would be coded as  
30  
31 enrolled in school in 2011. If a young woman reported grade 7 attainment in 2009 and grade 9  
32  
33 attainment in 2012, we assumed that the two years of additional education were accumulated in  
34  
35 2009 and 2010. This young woman would be coded as not enrolled in school in 2011.  
36  
37 Observations with illogical education data patterns between 2009 and 2012 (e.g. educational  
38  
39 attainment decreases over time) were coded as missing for school enrollment in 2011.  
40  
41  
42  
43  
44

45 We also explored the potential for confounding and effect measure modification by key  
46  
47 covariates. We examined age on January 1, 2011, categorized as ages of compulsory school  
48  
49 enrollment (ages 11-15 years), older than age for compulsory school enrollment but correct age  
50  
51 for grade (ages 16-17 years), and older than age for compulsory school enrollment while also  
52  
53 older than expected for grade (ages 18-20 years). We also examined indicators of household  
54  
55 socio-economic status (SES), measured with a composite index of household assets;  
56  
57  
58  
59  
60

1  
2  
3 household size; gender of household head; secondary school educational attainment of the  
4 household head; country of origin (South African or Mozambican descent); and pre-2011  
5 childbearing.  
6  
7  
8  
9

## 10 11 **Analysis**

12  
13 We used binomial regression models with an identity link to estimate the association between  
14 trial participation and school enrollment at 2011 and 2015. The 2011 enrollment outcome was  
15 used to isolate the potential for a sample selection effect (i.e. Were trial participants more likely  
16 to be in school than non-participants at the beginning of the trial?). We used the 2015  
17 enrollment outcome in a restricted cohort of young women who were enrolled in school in 2011  
18 to isolate the potential for a Hawthorne effect at the end of the trial (i.e. Were trial participants  
19 more likely to remain in school after four years than non-participants, conditional on being in  
20 school at the beginning of the trial?).  
21  
22  
23  
24  
25  
26  
27  
28  
29  
30

31  
32 We conducted unadjusted analyses and analyses adjusted for age, SES, gender and education  
33 of household head, household size, country of origin, and pre-2011 child-bearing. School  
34 enrollment decisions were likely highly influenced by age both because our cohort straddled the  
35 age limit for compulsory schooling in South Africa and because school dropout generally  
36 increases with age. Thus, we conducted age-stratified analyses to see whether the associations  
37 between trial participation and school enrollment differed by age category.  
38  
39  
40  
41  
42  
43  
44  
45  
46

47 Although trial results indicated that school attendance and enrollment outcomes were not  
48 significantly different between arms of the trial, the intervention was designed to incentivize  
49 school attendance.<sup>17</sup> For this reason, we conducted a sensitivity analysis restricting the trial  
50 participants to those who were randomly assigned to the control group only. We compared  
51 results from this restricted population to results from analysis of the full trial population.  
52  
53  
54  
55  
56  
57  
58  
59  
60

## RESULTS

Overall 3889 young women from the Agincourt HDSS were included in our cohort (Table 1). Median age was 15 years (IQR: 14-16). Young women tended to live in large households (mean size: 8.4), and household heads were often female (42%) and often lacked high school education (86%). The majority of young women were of South African descent (60%) and very few (7%) had begun child-bearing prior to 2011. Just under half of the young women (44%) went on to participate in HPTN 068, and they tended to be less likely to be on the youngest (ages 11-12) or oldest (ages 19-20) end of the age spectrum, though median age in both participants and non-participants was 15. Trial participants were also less likely to have begun child-bearing, slightly more likely to live in households headed by high school graduates, and slightly more likely to live in household with above-median SES.

In 2011, at the time of HPTN 068 trial start, nearly everyone in the cohort was enrolled in school (96%), likely due to the age and 2009 enrollment requirements placed on the cohort (Table 2). However, young women who became trial participants were already more likely to be enrolled in school (99%) compared to non-participants (93%) [RD (95% CI): 6.3 (5.1, 7.5)], indicating a sample selection effect likely occurred as a consequence of the school enrollment eligibility criterion. Though the overall association attenuated after covariate adjustment [aRD (95% CI): 2.9 (-0.7, 6.5)], strong associations were observed in the 18-20 year old age group [aRD (95% CI): 19.5 (5.6, 33.3)], compared to the younger two age groups [aRD<sub>11-15</sub> (95% CI): 0.4 (-5.2, 5.9); aRD<sub>16-17</sub> (95% CI): 6.3 (0.5, 12.2)].

At the end of the trial in 2015, the difference in school enrollment between trial participants (81%) and non-participants (69%) grew, with an adjusted overall risk difference of 6.8 (95% CI: 3.4, 10.2). To investigate whether any differences in school enrollment could be attributed to a

1  
2  
3 Hawthorne effect, we restricted the cohort to those enrolled in school in 2011 and examined  
4  
5 differences in 2015. Under this restriction, young women enrolled in the trial were still more  
6  
7 likely to remain in school in 2015 (82%), compared to those who did not (74%) with an adjusted  
8  
9 risk difference of 4.9 (95% CI: 1.5, 8.3)]. Again, the association was weakest among 11-15 year  
10  
11 olds [aRD (95% CI): 1.8 (-1.3, 5.0)], and strongest among 18-20 year olds [aRD (95% CI): 22.8  
12  
13 (7.3, 38.2)].  
14  
15

16  
17  
18 Results were largely unchanged when we restricted the trial participant population to those  
19  
20 enrolled in the control group only (Table 3). Although confidence intervals widened due to  
21  
22 reduced sample size with some newly spanning the null, the magnitudes of the risk difference  
23  
24 point estimates were largely unchanged from those in the primary analysis.  
25  
26  
27

## 28 **DISCUSSION**

29  
30 HPTN 068 found that cash transfers conditional on school enrollment did not influence HIV  
31  
32 acquisition among young women in a rural South African setting. Due to unexpectedly high  
33  
34 levels of school enrollment in both arms, the ability to explore schooling as a mechanism  
35  
36 through which cash transfers could influence HIV acquisition was limited. Here, we found  
37  
38 evidence to suggest that both Hawthorne effects and sample selection effects could threaten  
39  
40 the external validity of these findings. Overall, trial participants were more likely to remain in  
41  
42 school until graduation than non-participants. Differences in school enrollment status were  
43  
44 already apparent at the beginning of the study, suggesting that the trial selection criteria likely  
45  
46 pulled in young women with better school enrollment behaviors than those who were not  
47  
48 enrolled as trial participants (sample selection effect). Differences in school enrollment grew  
49  
50 larger as the trial progressed, and, importantly, remained strong even after restricting to those  
51  
52 enrolled in school in 2011 when the trial started, suggesting the changes in enrollment status  
53  
54 occurred during the trial itself (Hawthorne effect). Both sample selection and Hawthorne effects  
55  
56  
57  
58  
59  
60

1  
2  
3 may have diminished the differences in school enrollment between study arms and is one  
4 plausible explanation for the overall null study effect. The HPTN 068 trial was designed to  
5 activate the HIV prevention effects of education by incentivizing school attendance and retention  
6 in the intervention arm. With high levels of school attendance and retention across both arms of  
7 the trial, the ability to detect a trial effect was likely weakened.  
8  
9  
10  
11  
12  
13  
14  
15

16 Our findings that trial participation influenced school enrollment behavior could plausibly be  
17 explained by several characteristics of the HPTN 068 study design and protocol. First, all  
18 participants were aware of the objective of the study: to retain young women in school to  
19 prevent HIV. This information could result in school enrollment behavior change to align with  
20 perceived expectations of study staff or because young women were motivated to prevent HIV.  
21  
22 Second, compared to non-participants, trial participants were exposed to different networks  
23 likely to be supportive of school enrollment. Adult fieldworkers showed interest in the schooling  
24 of participants with yearly in-person data collection and monthly in-school data collection. Data  
25 were collected in 'camps' wherein trial participants were transported to study offices annually for  
26 a half-day of surveys and blood tests, and entertaining activities during wait periods (e.g.  
27 fingernail painting, photograph taking, magazine reading). This protocol could have fostered a  
28 cohesive group environment among trial participants resulting in positive peer pressure to  
29 maintain school enrollment. There is a growing body of evidence that interventions providing a  
30 safe space with adult mentorship and peer support can have positive outcomes for young  
31 women in sub-Saharan Africa,<sup>24-26</sup> a pathway that may have been activated with trial  
32 participation. Finally, trial participation provided access to certain health and social services that  
33 may have otherwise been inaccessible, including annual HIV and HSV-2 testing and counseling,  
34 linkage to care for those who tested positive, and linkage to social work services for young  
35 women who reported experiences of sexual abuse. These services may have enabled young  
36  
37  
38  
39  
40  
41  
42  
43  
44  
45  
46  
47  
48  
49  
50  
51  
52  
53  
54  
55  
56  
57  
58  
59  
60

1  
2  
3 women who would have otherwise struggled with serious physical and mental health outcomes  
4  
5 to remain in school.  
6  
7

8  
9 Associations between trial participation and school enrollment were strongest in older age  
10  
11 groups. The small differences observed in the youngest age group are understandable as they  
12  
13 were under the age-limit of compulsory education with requirements to remain in school  
14  
15 regardless of trial influence. For the oldest age group, trial selection criteria for lower grade  
16  
17 levels meant they were older than expected for their grade, and suggested a history of grade  
18  
19 repetition or temporary drop-out. That the trial protocol may have contributed to keeping older  
20  
21 teens in school is significant as the transition to adulthood carries extremely high HIV risk.<sup>23</sup>  
22  
23  
24  
25

26 This study was fairly unusual in that data were available on key study outcomes for the  
27  
28 underlying population from which study participants were drawn. The Agincourt HDSS routinely  
29  
30 collects school enrollment data on all residents in the study area and we were able to leverage  
31  
32 those data to assess differences between trial participants and non-participants. The majority of  
33  
34 epidemiologic studies do not have the benefit of complete background data on the target  
35  
36 population, and, as such, sample selection and Hawthorne effects are rarely empirically  
37  
38 assessed.<sup>5 10 12 14</sup> However, when Hawthorne effects are assessed, the direction of the  
39  
40 relationship between research participation and healthy outcomes tends to be positive, in line  
41  
42 with our findings of improved school enrollment outcomes.  
43  
44  
45  
46

47 It is important to note that data on HIV incidence, the primary endpoint of HPTN 068, were not  
48  
49 available for the underlying target population. We speculate that the improved schooling  
50  
51 trajectories we observed in trial participants likely resulted in reduced risk of HIV acquisition.<sup>17</sup>  
52  
53 Continued schooling is strongly associated with HIV prevention and reduced sexual risk  
54  
55 outcomes in young women in sub-Saharan Africa<sup>18 27 28</sup> and we observed lower HIV incidence  
56  
57  
58  
59  
60



1  
2  
3 (1.8%) than expected among trial participants (3%). However, we cannot say with certainty that  
4  
5 the association between trial participation and school enrollment extended to HIV protection.  
6  
7

8  
9 The potential for uncontrolled confounding requires that our results be interpreted cautiously.

10  
11 The differences we attribute to the Hawthorne effect were estimated in an observational dataset.

12  
13 Initial screens for trial eligibility were performed based on age data maintained by the Agincourt  
14  
15 HDSS and 82% of the eligible young women approached went on to enroll in the study, a fairly  
16  
17 high response rate.<sup>17</sup> Still, it is plausible that those who refused participation were different from  
18  
19 those who consented in ways that are also related to future school enrollment trajectories.

20  
21 Although we controlled for key socio-demographic characteristics that we theorized could be  
22  
23 related to both trial participation and school enrollment, the possibility for bias from unmeasured  
24  
25 confounding remains.  
26  
27

28  
29  
30 We offer three key conclusions from this study. First, epidemiologists should give greater weight  
31  
32 at the planning, analysis, and dissemination stages to identifying how sample selection and  
33  
34 Hawthorne effects can be minimized, assessed, and discussed. Prioritizing research with well-  
35  
36 defined target populations in areas with ongoing background data collection (e.g. HDSS  
37  
38 centers) would improve researchers' abilities to empirically assess the external validity of their  
39  
40 findings. Second, the sample selection effect we observed highlights how school-based  
41  
42 samples can differ in important ways from non-school based samples in terms of underlying  
43  
44 risk. Interventions focused on school-going adolescents may not reach those most in need of  
45  
46 prevention, an anticipated issue that was ultimately difficult to avoid given HPTN 068 design.  
47  
48 Third, the Hawthorne-specific findings suggest that aspects of the HPTN 068 protocol could  
49  
50 potentially be adapted for school retention interventions to prevent HIV. If the relationship we  
51  
52 observed is causal, the trial protocol increased school enrollment at a magnitude similar to  
53  
54 targeted cash transfer interventions and other fairly resource-intensive school retention  
55  
56  
57  
58  
59  
60

1  
2  
3 interventions in sub-Saharan Africa,<sup>21 29-31</sup> despite the actual contact with the young women  
4  
5 being limited to annual visits. Future work should examine key elements of the study protocol –  
6  
7 adult mentorship, peer support, school attendance monitoring, messaging around the link  
8  
9 between school and HIV, routine HIV/STI testing and linkage to care – to better understand their  
10  
11 relationship with school retention and HIV acquisition.  
12  
13  
14  
15  
16  
17  
18  
19  
20  
21  
22  
23  
24  
25  
26  
27  
28  
29  
30  
31  
32  
33  
34  
35  
36  
37  
38  
39  
40  
41  
42  
43  
44  
45  
46  
47  
48  
49  
50  
51  
52  
53  
54  
55  
56  
57  
58  
59  
60

1  
2  
3 **Acknowledgments:** The Agincourt Health and socio-Demographic Surveillance System is supported  
4 by the Wellcome Trust (058893/Z/99/A; 069683/Z/02/Z; 085477/Z/08/Z; 085477/B/08/Z), the University  
5 of the Witwatersrand, and Medical Research Council, South Africa. HPTN 068 was supported by Award  
6 Numbers UM1 AI068619 (HPTN Leadership and Operations Center), UM1AI068617 (HPTN Statistical  
7 and Data Management Center), and UM1AI068613 (HPTN Laboratory Center) from the National  
8 Institute of Allergy and Infectious Diseases, the National Institute of Mental Health and the National  
9 Institute on Drug Abuse of the National Institutes of Health. This work was also supported by NIMH  
10 (R01MH087118) and the Carolina Population Center and its NIH Center grant (P2C HD050924). The  
11 content is solely the responsibility of the authors and does not necessarily represent the official views of  
12 the National Institutes of Health.  
13  
14  
15  
16  
17  
18  
19  
20  
21  
22  
23  
24  
25  
26  
27  
28  
29  
30  
31  
32  
33  
34  
35  
36  
37  
38  
39  
40  
41  
42  
43  
44  
45  
46  
47  
48  
49  
50  
51  
52  
53  
54  
55  
56  
57  
58  
59  
60

1  
2  
3 **Figure 1.** Timeline of Agincourt HDSS education data collection and HPTN 068 trial duration  
4  
5  
6  
7  
8  
9  
10  
11  
12  
13  
14  
15  
16  
17  
18  
19  
20  
21  
22  
23  
24  
25  
26  
27  
28  
29  
30  
31  
32  
33  
34  
35  
36  
37  
38  
39  
40  
41  
42  
43  
44  
45  
46  
47  
48  
49  
50  
51  
52  
53  
54  
55  
56  
57  
58  
59  
60

For peer review only

**Table 1.** Socio-demographic characteristics of a cohort of 3889 young women between the ages of 13-20 years in rural Agincourt, South Africa, by participation in the HPTN 068 trial

|                                               | Total<br>(n=3889) |      | Trial participant <sup>2</sup><br>(n=1720) |      | Non-participant<br>(n=2169) |      | p-value <sup>1</sup> |
|-----------------------------------------------|-------------------|------|--------------------------------------------|------|-----------------------------|------|----------------------|
|                                               | N                 | %    | N                                          | %    | N                           | %    |                      |
| <b>Age in 2011</b>                            |                   |      |                                            |      |                             |      | <0.0001              |
| 11 - 12                                       | 188               | 4.8  | 26                                         | 1.5  | 162                         | 7.5  |                      |
| 13 - 14                                       | 1270              | 32.7 | 637                                        | 37.0 | 633                         | 29.2 |                      |
| 15 - 16                                       | 1591              | 40.9 | 793                                        | 46.1 | 798                         | 36.8 |                      |
| 17 - 18                                       | 667               | 17.2 | 239                                        | 13.9 | 428                         | 19.7 |                      |
| 19 - 20                                       | 173               | 4.5  | 25                                         | 1.5  | 148                         | 6.8  |                      |
| <b>SES*</b>                                   |                   |      |                                            |      |                             |      | 0.003                |
| At or above median                            | 1778              | 50   | 853                                        | 52.7 | 925                         | 47.8 |                      |
| Below median                                  | 1778              | 50   | 766                                        | 47.3 | 1012                        | 52.3 |                      |
| Missing                                       | 333               |      | 101                                        |      | 232                         |      |                      |
| <b>Household size*</b>                        |                   |      |                                            |      |                             |      | 0.5                  |
| Mean                                          | 8.4               |      | 8.4                                        |      | 8.5                         |      |                      |
| SD                                            | 4.2               |      | 4.0                                        |      | 4.4                         |      |                      |
| Missing                                       | 46                |      | 14                                         |      | 32                          |      |                      |
| <b>Gender of HH head*</b>                     |                   |      |                                            |      |                             |      | 0.3                  |
| Female                                        | 1590              | 41.7 | 691                                        | 40.8 | 899                         | 42.4 |                      |
| Male                                          | 2224              | 58.3 | 1004                                       | 59.2 | 1220                        | 57.6 |                      |
| Missing                                       | 75                |      | 25                                         |      | 50                          |      |                      |
| <b>Household head educational attainment*</b> |                   |      |                                            |      |                             |      | 0.02                 |
| <Grade 12                                     | 3062              | 86.3 | 1398                                       | 87.8 | 1664                        | 85.1 |                      |
| Grad 12 or higher                             | 486               | 13.7 | 194                                        | 12.2 | 292                         | 14.9 |                      |
| Missing                                       | 341               |      | 128                                        |      | 213                         |      |                      |
| <b>Country of origin*</b>                     |                   |      |                                            |      |                             |      | 0.2                  |
| South Africa                                  | 2315              | 59.6 | 1046                                       | 60.9 | 1269                        | 58.6 |                      |
| Mozambique                                    | 1570              | 40.4 | 673                                        | 39.2 | 897                         | 41.4 |                      |
| Missing                                       | 4                 |      | 1                                          |      | 3                           |      |                      |
| <b>Childbearing before 2011</b>               |                   |      |                                            |      |                             |      | <0.0001              |
| Yes                                           | 274               | 7.1  | 67                                         | 3.9  | 207                         | 9.5  |                      |
| No                                            | 3615              | 93.0 | 1653                                       | 96.1 | 1962                        | 90.5 |                      |
| <b>Intervention arm</b>                       |                   |      |                                            |      |                             |      |                      |
| Control                                       |                   |      | 820                                        | 50.4 |                             |      |                      |
| Intervention                                  |                   |      | 806                                        | 49.6 |                             |      |                      |
| <b>2011 school enrollment</b>                 |                   |      |                                            |      |                             |      | <0.0001              |
| Yes                                           | 3508              | 95.7 | 1637                                       | 99.2 | 1871                        | 92.9 |                      |
| No                                            | 158               | 4.3  | 14                                         | 0.9  | 144                         | 7.2  |                      |
| Missing                                       | 223               |      | 69                                         |      | 154                         |      |                      |
| <b>2015 school enrollment</b>                 |                   |      |                                            |      |                             |      | <0.0001              |
| Yes                                           | 2465              | 74.2 | 1234                                       | 19   | 1231                        | 68.5 |                      |
| No                                            | 856               | 25.8 | 290                                        | 81   | 566                         | 31.5 |                      |
| Missing                                       | 568               |      | 196                                        |      | 372                         |      |                      |

<sup>1</sup>p-values for categorical variables are from chi-square tests and for continuous variables are from t-tests

<sup>2</sup>Due to restrictions in the cohort construction to maintain comparable groups with respect to age and education status in 2009, not all of the 2533 HPTN 068 participants are represented.

\*Measured in 2009

**Table 2.** The relationship between HPTN 068 trial participation and school enrollment in 2011 and 2015, stratified by age, in the full cohort and the cohort restricted to those enrolled in school in 2011

|                                            | Enrollment | N    | Percent enrolled  | RD (95% CI)       | aRD <sup>1</sup> (95% CI) |
|--------------------------------------------|------------|------|-------------------|-------------------|---------------------------|
| <b>2011: Full cohort</b>                   |            |      |                   |                   |                           |
| <b>All ages</b>                            |            |      |                   |                   |                           |
| Trial participant                          | 1637       | 1651 | 99.2 (98.7, 99.6) | 6.3 (5.1, 7.5)    | 2.9 (-0.7, 6.5)           |
| Non-trial participant                      | 1871       | 2015 | 92.9 (91.7, 94.0) | 1                 | 1                         |
| <b>Ages 11-15</b>                          |            |      |                   |                   |                           |
| Trial participant                          | 1036       | 1038 | 99.8 (99.5, 1.00) | 0.6 (0.0, 1.2)    | 0.4 (-5.2, 5.9)           |
| Non-trial participant                      | 1115       | 1124 | 99.2 (98.6, 99.7) | 1                 | 1                         |
| <b>Ages 16-17</b>                          |            |      |                   |                   |                           |
| Trial participant                          | 532        | 539  | 98.7 (97.8, 99.7) | 6.9 (4.6, 9.2)    | 6.3 (0.5, 12.2)           |
| Non-trial participant                      | 593        | 646  | 91.8 (89.7, 93.9) | 1                 | 1                         |
| <b>Ages 18-20</b>                          |            |      |                   |                   |                           |
| Trial participant                          | 69         | 74   | 93.2 (87.5, 99.0) | 26.7 (18.5, 34.9) | 19.5 (5.6, 33.3)          |
| Non-trial participant                      | 163        | 245  | 66.5 (60.6, 72.4) | 1                 | 1                         |
| <b>2015: Full cohort</b>                   |            |      |                   |                   |                           |
| <b>All ages</b>                            |            |      |                   |                   |                           |
| Trial participant                          | 1234       | 1524 | 81.0 (79.0, 83.0) | 12.5 (9.6, 15.4)  | 6.8 (3.4, 10.2)           |
| Non-trial participant                      | 1231       | 1797 | 68.5 (66.4, 70.7) | 1                 | 1                         |
| <b>Ages 11-15</b>                          |            |      |                   |                   |                           |
| Trial participant                          | 837        | 952  | 87.9 (85.9, 90.0) | 3.8 (0.1, 6.9)    | 1.9 (-1.3, 5.0)           |
| Non-trial participant                      | 833        | 990  | 84.1 (81.9, 86.5) | 1                 | 1                         |
| <b>Ages 16-17</b>                          |            |      |                   |                   |                           |
| Trial participant                          | 361        | 503  | 71.8 (67.9, 75.8) | 12.5 (6.9, 18.1)  | 12.7 (6.7, 18.7)          |
| Non-trial participant                      | 346        | 584  | 59.3 (55.4, 63.4) | 1                 | 1                         |
| <b>Ages 18-20</b>                          |            |      |                   |                   |                           |
| Trial participant                          | 36         | 69   | 52.2 (41.6, 65.4) | 28.9 (15.8, 41.9) | 29.7 (16.1, 43.3)         |
| Non-trial participant                      | 52         | 223  | 23.3 (18.4, 29.6) | 1                 | 1                         |
| <b>2015: Restricted cohort<sup>2</sup></b> |            |      |                   |                   |                           |
| <b>All ages</b>                            |            |      |                   |                   |                           |
| Trial participant                          | 1234       | 1510 | 81.7 (79.8, 83.7) | 7.3 (4.5, 10.2)   | 4.9 (1.5, 8.3)            |
| Non-trial participant                      | 1231       | 1655 | 74.4 (72.3, 76.5) | 1                 | 1                         |
| <b>Ages 11-15</b>                          |            |      |                   |                   |                           |
| Trial participant                          | 837        | 950  | 88.1 (86.1, 90.2) | 3.2 (0.2, 6.3)    | 1.8 (-1.3, 5.0)           |
| Non-trial participant                      | 833        | 982  | 84.8 (82.6, 87.1) | 1                 | 1                         |
| <b>Ages 16-17</b>                          |            |      |                   |                   |                           |
| Trial participant                          | 361        | 496  | 72.8 (69.0, 76.8) | 7.6 (1.9, 13.3)   | 7.9 (1.9, 14.0)           |
| Non-trial participant                      | 346        | 531  | 65.2 (61.2, 69.3) | 1                 | 1                         |
| <b>Ages 18-20</b>                          |            |      |                   |                   |                           |
| Trial participant                          | 36         | 64   | 56.3 (45.3, 69.8) | 19.6 (5.1, 34.1)  | 22.8 (7.3, 38.2)          |
| Non-trial participant                      | 52         | 142  | 36.6 (29.5, 45.5) | 1                 | 1                         |

<sup>1</sup>Adjusted for socio-economic status (coded dichotomously at median household asset index score), country of origin (South African versus Mozambican), educational attainment of household head (coded dichotomously at Grade 12 attainment), gender of household head (male versus female), household size (coded linearly), and pre-2011 childbearing (yes versus no). Models that are not age-stratified are also adjusted for age coded in two-year categories.

<sup>2</sup>Restricted to all young women who were enrolled in school in 2011

RD=risk difference; aRD=adjusted risk difference; CI=confidence interval

**Table 3.** Sensitivity analysis comparing differences in school enrollment between HPTN 068 trial participants in the control arm only and non-trial participants. School enrollment outcome was analyzed in 2011 and 2015 and the analysis was stratified by age, in the full cohort and the cohort restricted to those enrolled in school in 2011

|                                            | Enrollment | N    | Percent enrolled  | RD (95% CI)       | aRD <sup>1</sup> (95% CI) |
|--------------------------------------------|------------|------|-------------------|-------------------|---------------------------|
| <b>2011: Full cohort</b>                   |            |      |                   |                   |                           |
| <b>All ages</b>                            |            |      |                   |                   |                           |
| Trial participant (control)                | 862        | 872  | 98.9 (98.2, 99.6) | 6.0 (4.7, 7.3)    | 3.2 (-1.4, 7.7)           |
| Non-trial participant                      | 1871       | 2015 | 92.9 (91.7, 94.0) | 1                 | 1                         |
| <b>Ages 11-15</b>                          |            |      |                   |                   |                           |
| Trial participant (control)                | 543        | 544  | 99.8 (99.5, 1.00) | 0.6 (0.0, 1.3)    | 0.4 (-7.3, 8.0)           |
| Non-trial participant                      | 1115       | 1124 | 99.2 (98.6, 99.7) | 1                 | 1                         |
| <b>Ages 16-17</b>                          |            |      |                   |                   |                           |
| Trial participant (control)                | 280        | 285  | 98.3 (96.7, 99.8) | 6.5 (3.8, 9.1)    | 5.7 (-0.9, 12.3)          |
| Non-trial participant                      | 593        | 646  | 91.8 (89.7, 93.9) | 1                 | 1                         |
| <b>Ages 18-20</b>                          |            |      |                   |                   |                           |
| Trial participant (control)                | 39         | 43   | 90.7 (82.0, 99.4) | 24.2 (13.7, 34.7) | 17.7 (2.6, 32.8)          |
| Non-trial participant                      | 163        | 245  | 66.5 (60.6, 72.4) | 1                 | 1                         |
| <b>2015: Full cohort</b>                   |            |      |                   |                   |                           |
| <b>All ages</b>                            |            |      |                   |                   |                           |
| Trial participant (control)                | 653        | 813  | 80.3 (77.6, 83.1) | 11.8 (8.3, 15.3)  | 6.9 (3.6, 10.3)           |
| Non-trial participant                      | 1231       | 1797 | 68.5 (66.4, 70.7) | 1                 | 1                         |
| <b>Ages 11-15</b>                          |            |      |                   |                   |                           |
| Trial participant (control)                | 448        | 504  | 88.9 (86.2, 91.6) | 4.8 (1.2, 8.3)    | 2.4 (-1.3, 6.1)           |
| Non-trial participant                      | 833        | 990  | 84.1 (81.9, 86.5) | 1                 | 1                         |
| <b>Ages 16-17</b>                          |            |      |                   |                   |                           |
| Trial participant (control)                | 186        | 269  | 69.1 (63.6, 74.7) | 9.9 (3.1, 16.7)   | 9.7 (2.6, 16.8)           |
| Non-trial participant                      | 346        | 584  | 59.3 (55.4, 63.4) | 1                 | 1                         |
| <b>Ages 18-20</b>                          |            |      |                   |                   |                           |
| Trial participant (control)                | 19         | 40   | 47.5 (32.0, 63.0) | 24.2 (7.7, 40.6)  | 21.5 (4.9, 38.1)          |
| Non-trial participant                      | 52         | 223  | 23.3 (18.4, 29.6) | 1                 | 1                         |
| <b>2015: Restricted cohort<sup>2</sup></b> |            |      |                   |                   |                           |
| <b>All ages</b>                            |            |      |                   |                   |                           |
| Trial participant (control)                | 653        | 803  | 81.3 (78.6, 84.0) | 6.9 (3.5, 10.4)   | 4.5 (1.3, 7.6)            |
| Non-trial participant                      | 1231       | 1655 | 74.4 (72.3, 76.5) | 1                 | 1                         |
| <b>Ages 11-15</b>                          |            |      |                   |                   |                           |
| Trial participant (control)                | 448        | 503  | 89.1 (86.3, 91.8) | 4.2 (0.7, 7.8)    | 2.5 (-1.2, 6.2)           |
| Non-trial participant                      | 833        | 982  | 84.8 (82.6, 87.1) | 1                 | 1                         |
| <b>Ages 16-17</b>                          |            |      |                   |                   |                           |
| Trial participant (control)                | 186        | 264  | 70.5 (65.0, 76.0) | 5.3 (-1.5, 12.1)  | 5.2 (-2.0, 12.3)          |
| Non-trial participant                      | 346        | 531  | 65.2 (61.2, 69.3) | 1                 | 1                         |
| <b>Ages 18-20</b>                          |            |      |                   |                   |                           |
| Trial participant (control)                | 19         | 36   | 52.8 (36.5, 69.1) | 16.2 (-2.0, 34.3) | 13.8 (-5.7, 33.4)         |
| Non-trial participant                      | 52         | 142  | 36.6 (29.5, 45.5) | 1                 | 1                         |

<sup>1</sup>Adjusted for socio-economic status (coded dichotomously at median household asset index score), country of origin (South African versus Mozambican), educational attainment of household head (coded dichotomously at Grade 12 attainment), gender of household head (male versus female), household size (coded linearly), and pre-2011 childbearing (yes versus no). Models that are not age-stratified are also adjusted for age coded in two-year categories.

<sup>2</sup>Restricted to all young women who were enrolled in school in 2011

RD=risk difference; aRD=adjusted risk difference; CI=confidence interval

1  
2  
3  
4  
5  
6  
7  
8  
9  
10  
11  
12  
13  
14  
15  
16  
17  
18  
19  
20  
21  
22  
23  
24  
25  
26  
27  
28  
29  
30  
31  
32  
33  
34  
35  
36  
37  
38  
39  
40  
41  
42  
43  
44  
45  
46  
47  
48  
49  
50  
51  
52  
53  
54  
55  
56  
57  
58  
59  
60

For peer review only



## References

1. Victora CG, Habicht J-P, Bryce J. Evidence-based public health: moving beyond randomized trials. *American journal of public health* 2004;94(3):400-05.
2. Rychetnik L, Frommer M, Hawe P, et al. Criteria for evaluating evidence on public health interventions. *Journal of Epidemiology & Community Health* 2002;56(2):119-27.
3. Westreich D, Edwards JK, Rogawski ET, et al. Causal impact: epidemiological approaches for a public health of consequence. *American journal of public health* 2016;106(6):1011.
4. Adair JG. The Hawthorne effect: A reconsideration of the methodological artifact. *Journal of applied psychology* 1984;69(2):334.
5. McCarney R, Warner J, Iliffe S, et al. The Hawthorne Effect: a randomised, controlled trial. *BMC medical research methodology* 2007;7(1):1.
6. Steckler A, McLeroy KR. The importance of external validity: American Public Health Association, 2008.
7. Cole SR, Stuart EA. Generalizing evidence from randomized clinical trials to target populations the actg 320 trial. *American journal of epidemiology* 2010;172(1):107-15.
8. Hernán MA, VanderWeele TJ. Compound treatments and transportability of causal inference. *Epidemiology (Cambridge, Mass)* 2011;22(3):368.
9. Westreich D, Edwards JK. Invited commentary: every good randomization deserves observation. *American journal of epidemiology* 2015;182(10):857-60.
10. Braunholtz DA, Edwards SJ, Lilford RJ. Are randomized clinical trials good for us (in the short term)? Evidence for a “trial effect”. *Journal of clinical epidemiology* 2001;54(3):217-24.
11. Robinson E, Hardman CA, Halford JC, et al. Eating under observation: a systematic review and meta-analysis of the effect that heightened awareness of observation has on laboratory measured energy intake. *The American journal of clinical nutrition* 2015 doi: 10.3945/ajcn.115.111195 [published Online First: 2015/07/17]
12. Menezes P, Miller WC, Wohl DA, et al. Does HAART efficacy translate to effectiveness? Evidence for a trial effect. *PloS one* 2011;6(7):e21824.
13. McCambridge J, Kypri K, Elbourne D. In randomization we trust? There are overlooked problems in experimenting with people in behavioral intervention trials. *J Clin Epidemiol* 2014;67(3):247-53. doi: 10.1016/j.jclinepi.2013.09.004 [published Online First: 2013/12/10]
14. McCambridge J, Witton J, Elbourne DR. Systematic review of the Hawthorne effect: new concepts are needed to study research participation effects. *J Clin Epidemiol* 2014;67(3):267-77. doi: 10.1016/j.jclinepi.2013.08.015 [published Online First: 2013/11/28]
15. Padian NS, McLOY SI, Balkus JE, et al. Weighing the gold in the gold standard: challenges in HIV prevention research. *AIDS (London, England)* 2010;24(5):621.
16. Pettifor A, MacPhail C, Selin A, et al. HPTN 068: a randomized control trial of a conditional cash transfer to reduce HIV infection in young women in South Africa—study design and baseline results. *AIDS and behavior* 2016;20(9):1863-82.
17. Pettifor A, MacPhail C, Hughes JP, et al. The effect of a conditional cash transfer on HIV incidence in young women in rural South Africa (HPTN 068): a phase 3, randomised controlled trial. *The Lancet Global Health* 2016;4(12):e978-e88.
18. Rosenberg M, Pettifor A, Miller WC, et al. Relationship between school dropout and teen pregnancy among rural South African young women. *International journal of epidemiology* 2015:dyy007.

19. Strassburg S, Meny-Gibert S, Russell B. Left unfinished: Temporary absence and drop-out from South African schools. *Access to Education*. Johannesburg, South Africa: Social Surveys Africa, 2010.
20. Department of Basic Education Republic of South Africa. Education for All 2014 Progress Report: South Africa. Pretoria, 2014.
21. Baird S, Ferreira FH, Özler B, et al. Relative effectiveness of conditional and unconditional cash transfers for schooling outcomes in developing countries: a systematic review. *Campbell systematic reviews* 2013;9(8)
22. Kahn K, Collinson MA, Gomez-Olive FX, et al. Profile: Agincourt Health and Socio-demographic Surveillance System. *International journal of epidemiology* 2012;41(4):988-1001. doi: 10.1093/ije/dys115 [published Online First: 2012/08/31]
23. Gómez-Olivé FX, Angotti N, Houle B, et al. Prevalence of HIV among those 15 and older in rural South Africa. *AIDS care* 2013;25(9):1122-28.
24. Erulkar AS, Muthengi E. Evaluation of Berhane Hewan: a program to delay child marriage in rural Ethiopia. *International Perspectives on Sexual and Reproductive Health* 2009:6-14.
25. Bandiera O, Buehren N, Burgess R, et al. Empowering adolescent girls: Evidence from a randomized control trial in Uganda. *Washington, DC: World Bank* 2012
26. Austrian K, Hewett P, Soler-Hampejsek E, et al. Adolescent Girls Empowerment Programme: Research and Evaluation Mid-Term Technical Report. Lusaka, Zambia: Population Council, 2016.
27. Pettifor AE, Levandowski BA, MacPhail C, et al. Keep them in school: the importance of education as a protective factor against HIV infection among young South African women. *International journal of epidemiology* 2008;37(6):1266-73. doi: 10.1093/ije/dyn131 [published Online First: 2008/07/11]
28. Jukes M, Simmons S, Bundy D. Education and vulnerability: the role of schools in protecting young women and girls from HIV in southern Africa. *AIDS (London, England)* 2008;22 Suppl 4:S41-56. doi: 10.1097/01.aids.0000341776.71253.04 [published Online First: 2008/12/17]
29. Cho H, Hallfors DD, Mbai, II, et al. Keeping adolescent orphans in school to prevent human immunodeficiency virus infection: evidence from a randomized controlled trial in Kenya. *The Journal of adolescent health : official publication of the Society for Adolescent Medicine* 2011;48(5):523-6. doi: 10.1016/j.jadohealth.2010.08.007 [published Online First: 2011/04/20]
30. Hallfors D, Cho H, Rusakaniko S, et al. Supporting adolescent orphan girls to stay in school as HIV risk prevention: evidence from a randomized controlled trial in Zimbabwe. *Am J Public Health* 2011;101(6):1082-8. doi: AJP.2010.300042 [pii] 10.2105/AJP.2010.300042 [published Online First: 2011/04/16]
31. Baird S, Chirwa E, McIntosh C, et al. The short-term impacts of a schooling conditional cash transfer program on the sexual behavior of young women. *Health economics* 2010;19 Suppl:55-68. doi: 10.1002/hec.1569 [published Online First: 2009/12/01]

1  
2  
3  
4  
5  
6  
7  
8  
9  
10  
11  
12  
13  
14  
15  
16  
17  
18  
19  
20  
21  
22  
23  
24  
25  
26  
27  
28  
29  
30  
31  
32  
33  
34  
35  
36  
37  
38  
39  
40  
41  
42  
43  
44  
45  
46  
47  
48  
49  
50  
51  
52  
53  
54  
55  
56  
57  
58  
59  
60

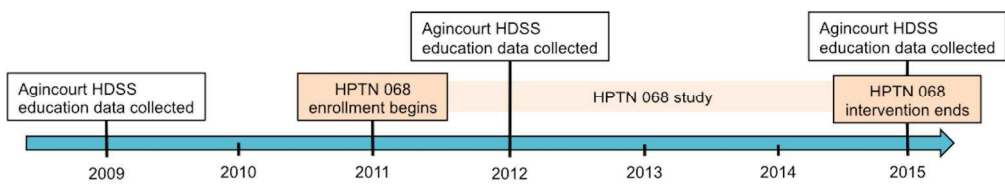

Figure 1. Timeline of Agincourt HDSS education data collection and HPTN 068 trial duration

381x285mm (300 x 300 DPI)

STROBE Statement—Checklist of items that should be included in reports of *cohort studies*

|                           | Item No | Recommendation                                                                                                                                                                                    | Page number |
|---------------------------|---------|---------------------------------------------------------------------------------------------------------------------------------------------------------------------------------------------------|-------------|
| <b>Title and abstract</b> | 1       | (a) Indicate the study's design with a commonly used term in the title or the abstract                                                                                                            | 2           |
|                           |         | (b) Provide in the abstract an informative and balanced summary of what was done and what was found                                                                                               | 2           |
| <b>Introduction</b>       |         |                                                                                                                                                                                                   |             |
| Background/rationale      | 2       | Explain the scientific background and rationale for the investigation being reported                                                                                                              | 4           |
| Objectives                | 3       | State specific objectives, including any prespecified hypotheses                                                                                                                                  | 5           |
| <b>Methods</b>            |         |                                                                                                                                                                                                   |             |
| Study design              | 4       | Present key elements of study design early in the paper                                                                                                                                           | 5-7         |
| Setting                   | 5       | Describe the setting, locations, and relevant dates, including periods of recruitment, exposure, follow-up, and data collection                                                                   | 5-7         |
| Participants              | 6       | (a) Give the eligibility criteria, and the sources and methods of selection of participants. Describe methods of follow-up                                                                        | 5-7         |
|                           |         | (b) For matched studies, give matching criteria and number of exposed and unexposed                                                                                                               |             |
| Variables                 | 7       | Clearly define all outcomes, exposures, predictors, potential confounders, and effect modifiers. Give diagnostic criteria, if applicable                                                          | 7           |
| Data sources/measurement  | 8*      | For each variable of interest, give sources of data and details of methods of assessment (measurement). Describe comparability of assessment methods if there is more than one group              | 7           |
| Bias                      | 9       | Describe any efforts to address potential sources of bias                                                                                                                                         | 8           |
| Study size                | 10      | Explain how the study size was arrived at                                                                                                                                                         | 6-7         |
| Quantitative variables    | 11      | Explain how quantitative variables were handled in the analyses. If applicable, describe which groupings were chosen and why                                                                      | 7-8         |
| Statistical methods       | 12      | (a) Describe all statistical methods, including those used to control for confounding                                                                                                             | 8           |
|                           |         | (b) Describe any methods used to examine subgroups and interactions                                                                                                                               | 8           |
|                           |         | (c) Explain how missing data were addressed                                                                                                                                                       | Table 1     |
|                           |         | (d) If applicable, explain how loss to follow-up was addressed                                                                                                                                    | Table 1     |
|                           |         | (e) Describe any sensitivity analyses                                                                                                                                                             | n/a         |
| <b>Results</b>            |         |                                                                                                                                                                                                   |             |
| Participants              | 13*     | (a) Report numbers of individuals at each stage of study—eg numbers potentially eligible, examined for eligibility, confirmed eligible, included in the study, completing follow-up, and analysed | 9           |
|                           |         | (b) Give reasons for non-participation at each stage                                                                                                                                              | n/a         |
|                           |         | (c) Consider use of a flow diagram                                                                                                                                                                | n/a         |
| Descriptive data          | 14*     | (a) Give characteristics of study participants (eg demographic, clinical, social) and information on exposures and potential confounders                                                          | 9           |
|                           |         | (b) Indicate number of participants with missing data for each variable of interest                                                                                                               | Table 1     |
|                           |         | (c) Summarise follow-up time (eg, average and total amount)                                                                                                                                       | n/a         |
| Outcome data              | 15*     | Report numbers of outcome events or summary measures over time                                                                                                                                    | Table 1     |
| Main results              | 16      | (a) Give unadjusted estimates and, if applicable, confounder-adjusted estimates and their precision (eg, 95% confidence interval). Make clear                                                     | Table 2     |

|                          |    |                                                                                                                                                                            |         |
|--------------------------|----|----------------------------------------------------------------------------------------------------------------------------------------------------------------------------|---------|
|                          |    | which confounders were adjusted for and why they were included                                                                                                             |         |
|                          |    | (b) Report category boundaries when continuous variables were categorized                                                                                                  | Table 2 |
|                          |    | (c) If relevant, consider translating estimates of relative risk into absolute risk for a meaningful time period                                                           | Table 2 |
| Other analyses           | 17 | Report other analyses done—eg analyses of subgroups and interactions, and sensitivity analyses                                                                             | Table 2 |
| <b>Discussion</b>        |    |                                                                                                                                                                            |         |
| Key results              | 18 | Summarise key results with reference to study objectives                                                                                                                   | 10      |
| Limitations              | 19 | Discuss limitations of the study, taking into account sources of potential bias or imprecision. Discuss both direction and magnitude of any potential bias                 | 10-13   |
| Interpretation           | 20 | Give a cautious overall interpretation of results considering objectives, limitations, multiplicity of analyses, results from similar studies, and other relevant evidence | 10-13   |
| Generalisability         | 21 | Discuss the generalisability (external validity) of the study results                                                                                                      | 10-13   |
| <b>Other information</b> |    |                                                                                                                                                                            |         |
| Funding                  | 22 | Give the source of funding and the role of the funders for the present study and, if applicable, for the original study on which the present article is based              | 14      |

\*Give information separately for exposed and unexposed groups.

**Note:** An Explanation and Elaboration article discusses each checklist item and gives methodological background and published examples of transparent reporting. The STROBE checklist is best used in conjunction with this article (freely available on the Web sites of PLoS Medicine at <http://www.plosmedicine.org/>, Annals of Internal Medicine at <http://www.annals.org/>, and Epidemiology at <http://www.epidem.com/>). Information on the STROBE Initiative is available at <http://www.strobe-statement.org>.
